# Supplementary material for: Prevalence of human infection with respiratory adenovirus in China: A systematic review and meta-analysis
Source: PubMed Central journal article supplement (PMC9987798; doi:10.1371/journal.pntd.0011151), 2023-02-22

# PLOS Neglected Tropical Diseases

## Prevalence of human infection with respiratory adenovirus in China: a systematic review and meta-analysis --Manuscript Draft--

|                                                                                                                                                                                                                                                                                                        |                                                                                                                                                                                                                                                                                                                                                                                                                                                                                                                                                                                                                                                                                                                                                                                                                                                                                                                                                                                                                                                                                                                                                                                                                                                                                                                                                                                                                                                                                                                                                                                                                                                                                                                                                                                                                                                                                                                                                                                                                   |
|--------------------------------------------------------------------------------------------------------------------------------------------------------------------------------------------------------------------------------------------------------------------------------------------------------|-------------------------------------------------------------------------------------------------------------------------------------------------------------------------------------------------------------------------------------------------------------------------------------------------------------------------------------------------------------------------------------------------------------------------------------------------------------------------------------------------------------------------------------------------------------------------------------------------------------------------------------------------------------------------------------------------------------------------------------------------------------------------------------------------------------------------------------------------------------------------------------------------------------------------------------------------------------------------------------------------------------------------------------------------------------------------------------------------------------------------------------------------------------------------------------------------------------------------------------------------------------------------------------------------------------------------------------------------------------------------------------------------------------------------------------------------------------------------------------------------------------------------------------------------------------------------------------------------------------------------------------------------------------------------------------------------------------------------------------------------------------------------------------------------------------------------------------------------------------------------------------------------------------------------------------------------------------------------------------------------------------------|
| <b>Manuscript Number:</b>                                                                                                                                                                                                                                                                              | PNTD-D-22-01337R1                                                                                                                                                                                                                                                                                                                                                                                                                                                                                                                                                                                                                                                                                                                                                                                                                                                                                                                                                                                                                                                                                                                                                                                                                                                                                                                                                                                                                                                                                                                                                                                                                                                                                                                                                                                                                                                                                                                                                                                                 |
| <b>Full Title:</b>                                                                                                                                                                                                                                                                                     | Prevalence of human infection with respiratory adenovirus in China: a systematic review and meta-analysis                                                                                                                                                                                                                                                                                                                                                                                                                                                                                                                                                                                                                                                                                                                                                                                                                                                                                                                                                                                                                                                                                                                                                                                                                                                                                                                                                                                                                                                                                                                                                                                                                                                                                                                                                                                                                                                                                                         |
| <b>Short Title:</b>                                                                                                                                                                                                                                                                                    | Prevalence of human infection with respiratory adenovirus in China                                                                                                                                                                                                                                                                                                                                                                                                                                                                                                                                                                                                                                                                                                                                                                                                                                                                                                                                                                                                                                                                                                                                                                                                                                                                                                                                                                                                                                                                                                                                                                                                                                                                                                                                                                                                                                                                                                                                                |
| <b>Article Type:</b>                                                                                                                                                                                                                                                                                   | Research Article                                                                                                                                                                                                                                                                                                                                                                                                                                                                                                                                                                                                                                                                                                                                                                                                                                                                                                                                                                                                                                                                                                                                                                                                                                                                                                                                                                                                                                                                                                                                                                                                                                                                                                                                                                                                                                                                                                                                                                                                  |
| <b>Keywords:</b>                                                                                                                                                                                                                                                                                       | Human adenovirus; China; respiratory tract infections; meta-analysis                                                                                                                                                                                                                                                                                                                                                                                                                                                                                                                                                                                                                                                                                                                                                                                                                                                                                                                                                                                                                                                                                                                                                                                                                                                                                                                                                                                                                                                                                                                                                                                                                                                                                                                                                                                                                                                                                                                                              |
| <b>Abstract:</b>                                                                                                                                                                                                                                                                                       | <p><b>Abstract</b></p> <p><b>Background</b> Human adenovirus (HAdV) is a major pathogen that causes acute respiratory tract infections (ARTI) and is frequently associated with outbreaks. The HAdV prevalence and the predominant types responsible for ARTI outbreaks remains obscure in China.</p> <p><b>Methods</b> A systematic review was performed to retrieve literature that reported outbreaks or etiological surveillance of HAdV among ARTI patients in China from 2009 to 2020. Patient information was extracted from the literature to explore the epidemiological characteristics and clinical manifestations of the infection of various HAdV types. The study is registered with PROSPERO, CRD42022303015.</p> <p><b>Results</b> A total of 950 articles (91 about outbreaks and 859 about etiological surveillance) meeting the selection criteria were included. Predominant HAdV types from etiological surveillance studies differed from those in outbreak events. Among 859 hospital-based etiological surveillance studies, positive detection rates of HAdV-3 (32.73%) and HAdV-7 (27.48%) were significantly higher than other virus types. While nearly half (45.71%) of outbreaks were caused by HAdV-7 with an overall attack rate of 22.32% among the 70 outbreaks for which the HAdVs were typed by the meta-analysis. Military camp and school were main outbreak settings with significantly different seasonal pattern and attack rate, where HAdV-55 and HAdV-7 were identified as the leading type, respectively. Clinical manifestations mainly depended on the HAdV types and patient's age. HAdV-55 infection tends to develop into pneumonia with poorer prognosis, especially in children &lt;5 years old.</p> <p><b>Conclusions</b> This study improves the understanding of epidemiological and clinical features of HAdV infections and outbreaks with different virus types, and helps to inform future surveillance and control efforts in different settings.</p> |
| <b>Additional Information:</b>                                                                                                                                                                                                                                                                         |                                                                                                                                                                                                                                                                                                                                                                                                                                                                                                                                                                                                                                                                                                                                                                                                                                                                                                                                                                                                                                                                                                                                                                                                                                                                                                                                                                                                                                                                                                                                                                                                                                                                                                                                                                                                                                                                                                                                                                                                                   |
| <b>Question</b>                                                                                                                                                                                                                                                                                        | <b>Response</b>                                                                                                                                                                                                                                                                                                                                                                                                                                                                                                                                                                                                                                                                                                                                                                                                                                                                                                                                                                                                                                                                                                                                                                                                                                                                                                                                                                                                                                                                                                                                                                                                                                                                                                                                                                                                                                                                                                                                                                                                   |
| <b>Government Employee</b>                                                                                                                                                                                                                                                                             | No - No authors are employees of the U.S. government.                                                                                                                                                                                                                                                                                                                                                                                                                                                                                                                                                                                                                                                                                                                                                                                                                                                                                                                                                                                                                                                                                                                                                                                                                                                                                                                                                                                                                                                                                                                                                                                                                                                                                                                                                                                                                                                                                                                                                             |
| Are you or any of the contributing authors an employee of the United States government?                                                                                                                                                                                                                |                                                                                                                                                                                                                                                                                                                                                                                                                                                                                                                                                                                                                                                                                                                                                                                                                                                                                                                                                                                                                                                                                                                                                                                                                                                                                                                                                                                                                                                                                                                                                                                                                                                                                                                                                                                                                                                                                                                                                                                                                   |
| Manuscripts authored by one or more US Government employees are not copyrighted, but are licensed under a <a href="#">CC0 Public Domain Dedication</a> , which allows unlimited distribution and reuse of the article for any lawful purpose. This is a legal requirement for US Government employees. |                                                                                                                                                                                                                                                                                                                                                                                                                                                                                                                                                                                                                                                                                                                                                                                                                                                                                                                                                                                                                                                                                                                                                                                                                                                                                                                                                                                                                                                                                                                                                                                                                                                                                                                                                                                                                                                                                                                                                                                                                   |

|                                                                                                                                                                                                                                                                                                                                                                                                                                                                                                 |                                                                                                                                                                                                            |
|-------------------------------------------------------------------------------------------------------------------------------------------------------------------------------------------------------------------------------------------------------------------------------------------------------------------------------------------------------------------------------------------------------------------------------------------------------------------------------------------------|------------------------------------------------------------------------------------------------------------------------------------------------------------------------------------------------------------|
| <p>This will be typeset if the manuscript is accepted for publication.</p>                                                                                                                                                                                                                                                                                                                                                                                                                      |                                                                                                                                                                                                            |
| <p><b>Financial Disclosure</b></p> <p>Enter a financial disclosure statement that describes the sources of funding for the work included in this submission and the role the funder(s) played. This includes grants and any commercial funding of the work or authors.</p> <p>This statement will be typeset if the manuscript is accepted for publication.</p> <p>Review the <a href="#">submission guidelines</a> and the instructions link below for detailed requirements and guidance.</p> | <p>Natural Science Foundation of China (No. 81825019) was awarded to WL. The funders had no role in study design, data collection and analysis, decision to publish, or preparation of the manuscript.</p> |
| <p><b>Competing Interests</b></p> <p>On behalf of all authors, disclose any competing interests that could be perceived to bias this work.</p> <p>This statement will be typeset if the manuscript is accepted for publication.</p> <p>Review the instructions link below and PLOS NTDs' <a href="#">competing interests</a> policy to determine what information must be disclosed at submission.</p>                                                                                          | <p>We declare no competing interests.</p>                                                                                                                                                                  |
| <p><b>Data Availability</b></p> <p>Provide a <b>Data Availability Statement</b> in the box below. This statement should detail where the data used in this submission can be accessed. This statement will be typeset if the manuscript is accepted for publication.</p> <p>Before publication, authors are required to make all data underlying their findings</p>                                                                                                                             | <p>All relevant data are within the manuscript and its Supporting Information files.</p>                                                                                                                   |

fully available, without restriction. Review our [PLOS Data Policy](#) page for detailed information on this policy. Instructions for writing your Data Availability statement can be accessed via the Instructions link below.

1 **Prevalence of human infection with respiratory adenovirus in China:**  
2 **a systematic review and meta-analysis**

3 Mei-Chen Liu<sup>1,2¶</sup>, Qiang Xu<sup>2¶</sup>, Ting-Ting Li<sup>2,3</sup>, Tao Wang<sup>2</sup>, Bao-Gui Jiang<sup>2</sup>, Chen-  
4 Long Lv<sup>2</sup>, Xiao-Ai Zhang<sup>2</sup>, Wei Liu<sup>1,2\*</sup>, Li-Qun Fang<sup>1,2,3\*</sup>

5

6 <sup>1</sup>School of Public Health, Anhui Medical University

7 <sup>2</sup>State Key Laboratory of Pathogen and Biosecurity, Beijing Institute of Microbiology  
8 and Epidemiology, Beijing, 100071, P. R. China

9 <sup>3</sup>School of Public Health, Guizhou Medical University

10

11 \*Corresponding author

12 Li-Qun Fang or Wei Liu, State Key Laboratory of Pathogen and Biosecurity, Beijing  
13 Institute of Microbiology and Epidemiology, 20 Dong-Da Street, Fengtai District,  
14 Beijing 100071, P. R. China, fang\_lq@163.com (LQF) or lwbime@163.com (WL).

15

16 ¶These authors contributed equally to this work.

17 **Abstract**

18 **Background** Human adenovirus (HAdV) is a major pathogen that causes acute  
19 respiratory tract infections (ARTI) and is frequently associated with outbreaks. The  
20 HAdV prevalence and the predominant types responsible for ARTI outbreaks remains  
21 obscure in China.

22 **Methods** A systematic review was performed to retrieve literature that reported  
23 outbreaks or etiological surveillance of HAdV among ARTI patients in China from  
24 2009 to 2020. Patient information was extracted from the literature to explore the  
25 epidemiological characteristics and clinical manifestations of the infection of various  
26 HAdV types. The study is registered with PROSPERO, CRD42022303015.

27 **Results** A total of 950 articles (91 about outbreaks and 859 about etiological  
28 surveillance) meeting the selection criteria were included. Predominant HAdV types  
29 from etiological surveillance studies differed from those in outbreak events. Among  
30 859 hospital-based etiological surveillance studies, positive detection rates of HAdV-  
31 3 (32.73%) and HAdV-7 (27.48%) were significantly higher than other virus types.  
32 While nearly half (45.71%) of outbreaks were caused by HAdV-7 with an overall  
33 attack rate of 22.32% among the 70 outbreaks for which the HAdVs were typed by  
34 the meta-analysis. Military camp and school were main outbreak settings with  
35 significantly different seasonal pattern and attack rate, where HAdV-55 and HAdV-7  
36 were identified as the leading type, respectively. Clinical manifestations mainly

37 depended on the HAdV types and patient's age. HAdV-55 infection tends to develop  
38 into pneumonia with poorer prognosis, especially in children <5 years old.

39 **Conclusions** This study improves the understanding of epidemiological and clinical  
40 features of HAdV infections and outbreaks with different virus types, and helps to  
41 inform future surveillance and control efforts in different settings.

42

43 **Keywords:** Human adenovirus; China; respiratory tract infections; meta-analysis.

## 44 **Author Summary**

45        In this systematic review, we made an exhaustive search of published literature  
46 that reported outbreaks or etiological surveillance of HAdV among ARTI patients in  
47 China from 2009 to 2020. A total of 950 studies were included in this study, and we  
48 explored the epidemiological characteristics and clinical manifestations of the  
49 infection of various HAdV types. Positive detection rates of HAdV-3 (32.73%) and  
50 HAdV-7 (27.48%) were significantly higher than other virus types according to the  
51 hospital-based etiological surveillance studies. Nearly half (45.71%) of outbreaks  
52 were caused by HAdV-7 with an overall attack rate of 22.32% among the 70  
53 outbreaks for which the HAdVs were typed by the meta-analysis. Military camp and  
54 school were main outbreak settings with significantly different seasonal pattern and  
55 attack rate, where HAdV-55 and HAdV-7 were identified as the leading type,  
56 respectively. Clinical manifestations mainly depended on the HAdV types and  
57 patient's age. HAdV-55 infection tends to develop into pneumonia with poorer  
58 prognosis, especially in children <5 years old. This study will help improve the  
59 epidemiological and clinical understanding of different HAdV types of human  
60 infections and thus will promote the targeted surveillance and measures to control and  
61 prevent HAdV infection.

## 62 **Introduction**

63 Infection with human adenovirus (HAdV) causes a broad spectrum of clinical  
64 illnesses, e.g., pharyngoconjunctival fever, keratoconjunctivitis, pneumonia,  
65 hemorrhagic cystitis, gastroenteritis, acute respiratory disease, cardiomyopathy, and  
66 encephalitis, which varies depending on the infected virus types and is severe among  
67 immunocompromised patients such as organ transplant patients [1]. Even unexplained  
68 liver injury or hepatitis was reported by two recent independent studies with UK  
69 children with HAdV- 2 infection, suggesting that HAdV-2 may trigger liver damage  
70 through the immune mechanisms of genetically predisposed children[2, 3]. There are  
71 at least 113 recognized HAdV types (<http://hadv.wg.gmu.edu/>), which are assigned to  
72 seven subgroups (A–G) according to biophysical, biochemical, and genetic  
73 characteristics, with marked differences in tissue tropism and clinical  
74 manifestations[4]. Species C, species B, subspecies B1 and B2 were the most  
75 common HAdV types found in respiratory samples among pediatric patients with  
76 ARTI[5, 6].

77 In recent years, new serotypes or subspecies were increasingly recognized by  
78 using phylogenetic analysis, which arise from genome recombination between the  
79 hexon gene, fiber, and penton genes. For any of the emerging new types or  
80 recombinant strains, there is a high potential of spreading widely and causes epidemic  
81 outbreaks, due to the lack of herd immunity and specific vaccine intervention, posing  
82 severe threats to public health[7-10]. Acute respiratory infection caused by HAdV is



83 the leading cause of morbidity in military forces worldwide. Since 1971, U.S. military  
84 recruits have been vaccinated with oral HAdV-4 and HAdV-7 vaccines, which has  
85 significantly decreased the epidemics of HAdV in the military[1, 11].

86 In recent years, there has been an increase in studies from hospital-based  
87 etiological surveillance, reflecting a growing awareness of the importance of HAdV  
88 as respiratory pathogens. A global study concluded that adenovirus infections  
89 accounted for 5–10% of respiratory infections in children and 1–7% in adults, and  
90 caused pneumonia in up to 20% of newborns and infants. In patients with severe  
91 HAdV pneumonia, the mortality rate may exceed 50% [12]. The positive detection rate  
92 of adenovirus was 3.9% and the mortality rate was 3% from 2004 to 2018 among  
93 inpatients hospitalized due to severe acute respiratory infection[13]. Studies in  
94 mainland China have shown that positive detection rate of adenovirus among ARTI  
95 patients was approximately 5.8%–13%, and the main affected groups were children  
96 and young adults[14]. Studies showed that the positive detection rate of adenovirus  
97 was 5.64% among hospitalized children with ARTI in Beijing from 2017 to 2018 and  
98 6.9% in Zhejiang from 2018 to 2019[15, 16]. In general, there is still a lack of data on  
99 the HAdV prevalence and the predominant virus types responsible for ARTI sporadic  
100 outbreaks or epidemics in China.

101 Here we conduct a systematic review and meta-analysis of all published research  
102 articles on outbreak investigation and etiological surveillance of HAdV associated  
103 with cases of respiratory infection in China at the nation-wide level from 2009 to

104 2020 to evaluate the HAdV prevalence, virus types, seasonality, as well as to  
105 characterize patients' demographic and clinical data. This information might help to  
106 comprehensively understand the epidemic patterns of HAdV in China and support the  
107 adoption of targeted prevention and control measures.

108

## 109 **Materials and Methods**

110 This review was conducted according to the Preferred Reporting Items for  
111 Systematic Reviews and Meta-Analyses (PRISMA) statement (data in S1 File), and  
112 has been registered with the international prospective register of systematic reviews  
113 (PROSPERO) (International Prospective Register of Ongoing Systematic Reviews)  
114 (CRD42022303015)[17].

### 115 **Search strategy and selection criteria**

116 Literature search was performed from the major databases including the PubMed  
117 database (<https://pubmed.ncbi.nlm.nih.gov/>), China National Knowledge  
118 Infrastructure (CNKI) (<http://www.cnki.net/>), Chongqing VIP Chinese Science and  
119 Technology Journal Database (CQVIP) (<http://www.cqvip.com>) and Wanfang  
120 databases (<http://www.wanfangdata.com.cn/>), with the keywords ('HAdV' OR  
121 'adenovirus' [Title/Abstract]) AND ('respiratory' [Title/Abstract] OR 'pneumonia'  
122 [Title/Abstract]), AND ('China' OR 'the mainland of China' OR 'Chinese mainland'  
123 OR 'Taiwan' OR 'Hong Kong' OR 'Macau' OR 'Macao' [Title/Abstract]) (Table 1 in S2

124 File). All the articles published between January 2009 and March 2021 were searched  
125 without language limitations.

126 We included studies of human infection with HAdV, across all settings (i.e.,  
127 hospital, community, long-term care) and among all age groups (pediatric and adult  
128 patients). We included etiological surveillance studies and outbreak investigation, but  
129 excluded reviews, editorials, letters, case studies, randomized controlled trials and  
130 experimental studies. Studies were eligible if they explicitly described the total  
131 number of individuals tested and those that were positive for HAdV infections in  
132 humans. The following articles were excluded: (1) drug, vaccine trials, mechanism  
133 studies, animal experiments or reviews for HAdV; (2) etiological surveillance studies  
134 with sampling size <100 for laboratory test or HAdV positive detection <10; (3)  
135 describing cases imported from abroad after international travel; (4) lacking  
136 information about methods of laboratory diagnosis, specimens tested; (5) evaluations  
137 on laboratory methods for HAdV; (6) study period beyond the duration from 2009 to  
138 2020 (Table 2 and Table 3 in S2 File).

139 Titles and abstracts of the retrieved studies were screened using Endnote X9  
140 independently by two reviewers (MCL and TTL) to identify studies potentially  
141 eligible for inclusion, and then the full texts were retrieved and independently  
142 assessed for eligibility. Discrepancies between reviewers were resolved by consensus  
143 or a third reviewer (QX). Studies potentially describing overlapping data were noted

144 and the duplication were removed (e.g., same hospital and population during a  
145 overlapping time period).

## 146 **Data extraction and variable definition**

147 One of the authors (MCL) extracted data from included studies using a  
148 standardized data collection form. The following variables were collected: reference  
149 ID, author, publication year, study sites, start and end dates, name(s) of healthcare  
150 facility; study design (etiological surveillance study, outbreak investigation), outbreak  
151 setting (school/daycare, healthcare comprised of hospitals and long-term care  
152 facilities, military camps, swimming pools), age group, patient population, mean or  
153 median age, gender proportion, laboratory test methods (molecular, serological) and  
154 type of HAdV, sample size, absolute number or rate of positive detection, presence of  
155 clinical symptoms or syndromes of patients if reported (Table 4 and Table 5 in S2  
156 File). For quality assurance, another two authors (QX, TW) randomly sampled 25% of  
157 recorded data to confirm accuracy and completeness.

158 For definition of outbreak event, all those recognized and reported outbreaks  
159 related to HAdV by health agencies were included. Otherwise, an outbreak event was  
160 defined as a number of clustered HAdV cases with a higher incidence than the  
161 average or expected incidence for a region where the cases occur[18]. All the events  
162 had to be laboratory confirmed, e.g., etiological pathogen determined to be HAdV by  
163 molecular methods (PCR) or serological methods (ELISA, IFA), while those  
164 outbreaks reporting suspected HAdV without laboratory confirmation for HAdV were

165 not included in the analysis. For outbreak investigation, we extracted additional  
166 information regarding the exact date of outbreak, attack rate, numbers of primary  
167 cases and persons at risk, and number of secondary cases if available. For articles  
168 reporting more than one outbreak, data were separately extracted for each outbreak.  
169 For outbreaks reported in multiple publications, we included the one that reported  
170 more detailed data.

171 Four age groups were defined for comparison, including children (<5 years old),  
172 adolescent (5–17 years old), adult (18–59 years old), and the elderly ( $\geq 60$  years old).  
173 When a study did not mention any age information, the all-age group was specified.  
174 Seven regions were defined according to the ecoclimatic characteristics, i.e.,  
175 Northeast China, North China, Inner Mongolia-Xinjiang, Qinghai-Tibet, Southwest  
176 China, Central China, and South China[19].

## 177 **Meta-analysis**

178 We performed the meta-analysis to evaluate demographic characteristics of  
179 patients, attack rate, or positive detection rate for HAdV. Briefly, the pooled  
180 proportion and 95% CI were estimated using the inverse variance combined with  
181 fixed effects or random effects models depending on the degree of the heterogeneity  
182 between studies. Heterogeneity was quantified using the statistic Higgin's  $I^2$ , when its  
183 value was greater than 50%, random effects model was used, otherwise, fixed effects  
184 model was applied[20]. We performed the meta-analysis to estimate the clinical  
185 manifestations that were related to different HAdV types, based on the 105 articles

186 with a study size more than 20 patients and reporting the information of clinical  
187 manifestation. For those clinical manifestations which were reported only in one  
188 study, the proportion was calculated without a 95% CI estimated (Data in S3 File). All  
189 maps were produced by using the ArcGIS 10.7 software. The Meta program package  
190 in R 4.1.2 software was used to merge the rates and draw forest plots. All analyses  
191 were conducted with R 4.1.2 software.

192

## 193 **Results**

### 194 **Temporal and spatial features of publications and patients**

195 A total of 5,056 studies published from January 2009 to March 2021 were  
196 identified, 3,874 studies underwent title and abstract screening after duplicate  
197 removal, among which 1,329 were assessed via full-text screening. We included 950  
198 studies (881 in Chinese and 69 in English) in the final analysis, comprised of 859  
199 etiological surveillance studies involving 119,838 patients and 91 outbreak  
200 investigations involving 15,940 patients (Fig 1, Data in S4 File).

201

202 **Fig 1. Flow diagram of the literature review.** Literature search was performed from  
203 the major databases including the PubMed database  
204 (<https://pubmed.ncbi.nlm.nih.gov/>), China National Knowledge Infrastructure (CNKI)  
205 (<http://www.cnki.net/>), Chongqing VIP Chinese Science and Technology Journal

206 Database (CQVIP) (<http://www.cqvip.com>) and Wanfang databases  
207 (<http://www.wanfangdata.com.cn/>).

208

209 Of the 91 articles reporting 97 outbreak events, 68 (74.73%) were published  
210 between 2014–2019, with the highest number of articles published in 2014 (14  
211 articles), followed by 2017 (13) (Fig 2A). Of the 859 etiological surveillance studies,  
212 594 (69.15%) were published during 2015–2020, with the largest number published in  
213 2015 (135 articles), followed by 2016 (103) (Fig 2C).

214

215 **Fig 2. Temporal pattern of reported outbreaks and etiological surveillance as**  
216 **well as the HAdV types in China.** (A) number of articles about reported outbreak  
217 events over publication year; (B) number of reported outbreaks according to each  
218 HAdV type group over publication year; (C) number of articles about etiological  
219 surveillance of HAdV over publication year; (D) number of patients reported in  
220 etiological surveillance according to each HAdV type group over publication year.  
221 Other in the panel D indicate those rarely seen HAdV types, including HAdV-21 (30  
222 patients), HAdV-57 (18), HAdV-31 (5), HAdV-50 (2), HAdV-12 (1), HAdV-35 (1),  
223 and HAdV-104 (1). Deadline for literature search is March 2021.

224

225 A comparable number of outbreaks took place in Northern and Southern China  
226 (Table 1). The geographic discrepancy of seasonal timing was shown for the

227 outbreaks, with most of the outbreak events occurring in the winter season in  
228 Northern China (28/46), while a dual seasonal timing was observed in Southern  
229 China, at the turn of spring and summer and winter separately (44/51) (Fig 3A). The  
230 overall attack rate was estimated to be 15.91% (95% CI: 13.85–17.98). A higher  
231 attack rate was observed in Northern China than in Southern China (19.01%, 95% CI:  
232 14.42–23.60 versus 13.53%, 95% CI: 11.28–15.77). When the outbreak settings were  
233 compared, the highest attack rate was observed in military camps (23.55%, 95%  
234 CI:18.02–29.07), followed by swimming pools (22.47%, 95% CI: 12.49–32.45),  
235 hospitals (19.75%, 95% CI: 8.64–30.86) and schools (6.19%, 95% CI: 4.92–7.46)  
236 (Fig 3B). In contrast with the outbreak events, the etiological surveillance studies  
237 among ARTI patients reported comparable interregional positive rate (4.13%, 95%  
238 CI: 3.95–4.31 in Southern China, 4.15%, 95% CI: 3.95–4.34 in Northern China), and  
239 the overall positive detection rate was estimated to be 4.21% (95% CI: 4.07–4.34)  
240 (Fig 3C, Table 6 and Table 10 in S2 File).



241 **Table 1. Attack rate and positive detection rate of HAdV by areas, seasons, patients' ages, settings and virus types based on meta-**  
 242 **analysis.**

|                       | Outbreak events                          |        |                                              | Etiological surveillance |         |                                                         |
|-----------------------|------------------------------------------|--------|----------------------------------------------|--------------------------|---------|---------------------------------------------------------|
|                       | Number of articles<br>(No. of outbreaks) | Cases  | Attack rate by meta-<br>analysis % (95% CI)* | Number of articles       | Cases   | Positive detection rate by meta-<br>analysis % (95% CI) |
| <b>Number</b>         | 91 (97)                                  | 15,940 | 15.91 (13.85, 17.98)                         | 859                      | 119,838 | 4.21(4.07, 4.34)                                        |
| <b>Mortality</b>      | 4 (4)                                    | 4      | -                                            | 9                        | 37      | -                                                       |
| <b>Areas**</b>        |                                          |        |                                              |                          |         |                                                         |
| <b>Northern</b>       | 44 (46)                                  | 9,182  | 19.01 (14.42, 23.60)                         | 283                      | 19,955  | 4.15 (3.95, 4.34)                                       |
| <b>Southern</b>       | 48 (51)                                  | 6,758  | 13.53 (11.28, 15.77)                         | 584                      | 97,162  | 4.13 (3.95, 4.31)                                       |
| <b>Season</b>         |                                          |        |                                              |                          |         |                                                         |
| <b>Spring</b>         | 19 (20)                                  | 899    | 5.92 (4.47, 7.36)                            | 39                       | 2,047   | 5.21 (4.35, 6.07)                                       |
| <b>Summer</b>         | 16 (17)                                  | 440    | 16.76 (12.47, 21.04)                         | 39                       | 1,780   | 4.64 (3.82, 5.47)                                       |
| <b>Autumn</b>         | 16 (17)                                  | 394    | 5.71 (3.41, 8.01)                            | 36                       | 1,278   | 3.62 (2.95, 4.29)                                       |
| <b>Winter</b>         | 40 (43)                                  | 8,453  | 22.65 (16.33, 28.96)                         | 37                       | 2,042   | 3.54 (2.83, 4.24)                                       |
| <b>Age</b>            |                                          |        |                                              |                          |         |                                                         |
| <b>Children</b>       | 6 (6)                                    | 121    | 12.78 (7.95, 17.62)                          | 174                      | 10,671  | 4.04 (3.76, 4.31)                                       |
| <b>Adolescent</b>     | 40 (43)                                  | 2,042  | 6.52 (5.5, 7.55)                             | 8                        | 531     | 4.45 (2.55, 6.36)                                       |
| <b>Adult</b>          | 44 (47)                                  | 13,734 | 23.56 (18.31, 28.8)                          | 28                       | 1,219   | 3.44 (2.76, 4.12)                                       |
| <b>The elderly</b>    | 0 (0)                                    | 0      |                                              | 9                        | 229     | 2.81 (1.84, 3.78)                                       |
| <b>All-age groups</b> | 1 (1)                                    | 43     | 25.29                                        | 644                      | 107,188 | 4.29 (4.12, 4.45)                                       |
| <b>Settings</b>       |                                          |        |                                              |                          |         |                                                         |
| <b>School</b>         | 41 (43)                                  | 3,386  | 6.19 (4.92, 7.46)                            | 0                        | 0       |                                                         |

|                      |         |        |                      |     |         |                      |
|----------------------|---------|--------|----------------------|-----|---------|----------------------|
| <b>Military camp</b> | 37 (40) | 11,849 | 23.55 (18.02, 29.07) | 0   | 0       |                      |
| <b>Hospital</b>      | 5 (5)   | 142    | 19.75 (8.64, 30.86)  | 859 | 119,838 | 4.21(4.07, 4.34)     |
| <b>Swimming pool</b> | 9 (9)   | 563    | 22.47 (12.49, 32.45) | 0   | 0       |                      |
| <b>Types†</b>        |         |        |                      |     |         |                      |
| <b>HAdV-1</b>        | 0 (0)   | 0      | -                    | 40  | 466     | 6.70 (5.39, 8.01)    |
| <b>HAdV-2</b>        | 0 (0)   | 0      | -                    | 44  | 772     | 8.90 (7.31, 10.50)   |
| <b>HAdV-3</b>        | 9 (11)  | 711    | 5.55 (2.63, 8.48)    | 60  | 2,869   | 32.73 (22.13, 43.34) |
| <b>HAdV-4</b>        | 7 (7)   | 150    | 8.75 (0.00, 21.30)   | 30  | 137     | 2.07 (1.41, 2.74)    |
| <b>HAdV-5</b>        | 0 (0)   | 0      | -                    | 38  | 249     | 3.55 (2.78, 4.32)    |
| <b>HAdV-6</b>        | 0 (0)   | 0      | -                    | 21  | 83      | 1.97 (1.23, 2.70)    |
| <b>HAdV-7</b>        | 30 (32) | 7,048  | 22.32 (14.78, 29.86) | 59  | 2,518   | 27.48 (17.04, 37.91) |
| <b>HAdV-11</b>       | 0 (0)   | 0      | -                    | 4   | 186     | 16.14 (1.89, 30.40)  |
| <b>HAdV-14</b>       | 3 (4)   | 92     | 8.83 (6.31, 11.35)   | 12  | 43      | 2.01 (0.92, 3.09)    |
| <b>HAdV-21</b>       | 0 (0)   | 0      | -                    | 7   | 30      | 0.87 (0.17, 1.57)    |
| <b>HAdV-31</b>       | 0 (0)   | 0      | -                    | 4   | 5       | 0.33 (0.00, 0.73)    |
| <b>HAdV-55</b>       | 16 (16) | 4,043  | 27.18 (19.16, 35.20) | 25  | 258     | 4.70 (3.40, 6.00)    |
| <b>HAdV-57</b>       | 0 (0)   | 0      | -                    | 8   | 18      | 1.01 (0.51, 1.50)    |

243 \* 53 outbreaks recording attack rate were included in the total; 2, 26, 24 and 1 outbreaks recording attack rate were included in the children, adolescent, adult, and all age groups, respectively;

244 13, 8, 6 and 25 outbreaks recording attack rate were included in the spring, summer, autumn and winter groups, respectively; 25 and 28 outbreaks recording attack rate were included in the

245 Northern and Southern groups, respectively; 22, 2, 6 and 23 outbreaks recording attack rate were included in the military, hospital swimming pool and school groups, respectively; 4, 2, 17, 1

246 and 9 outbreaks recording attack rate were included in the HAdV-3, HAdV-4, HAdV-7, HAdV-14 and HAdV-55 groups, respectively.

247 \*\* Of the 848 articles mentioning locations, 19 mentioned both Northern and Southern China.

248 †HAdV type with case number > 5 were included, other rarely seen types including HAdV-50 (2 cases), HAdV-12 (1), HAdV-35 (1), and HAdV-104 (1).

249 **Fig 3. Attack rate of HAdV in outbreaks and positive detection rate of HAdV in**  
250 **etioloical surveillance over months based on the meta-analysis.** (A) attack rate by  
251 region; (B) attack rate by settings; (C) positive detection rate by regions; (D) attack  
252 rate by age groups. The bars in panels A, B, and D indicate the number of outbreaks,  
253 and the intervals indicate the attack rate and 95% CI. The bars on panel C indicate the  
254 case number in etioloical surveillance, and the intervals indicate the positive  
255 detection rate and 95% CI.

256

### 257 **Demographic characteristics of patients**

258 The highest number of outbreak events was observed in the adult group (47),  
259 followed by adolescents (43) and children (6). The highest attack rate was shown in  
260 adults (23.56%, 95% CI: 18.31–28.80), followed by children (12.78%, 95% CI: 7.95–  
261 17.62) and adolescents (6.52%, 95% CI: 5.50–7.55). An age pattern of HAdV  
262 infection was shown from the etioloical surveillance data, with higher positive rate  
263 observed in children (4.04%, 95% CI: 3.76–4.31) and adolescents (4.45%, 95% CI:  
264 2.55–6.36) than those of the two older groups (Table 1). Seasonal pattern differed  
265 between age groups. For children and adolescent, over half of the outbreaks occurred  
266 in autumn and spring (29 of 49 outbreaks), while for adult groups, most outbreaks  
267 occurred in winter (38/47) (Fig 3D, Table 11 in S2 File).

268 Among 97 outbreaks that reported settings, the highest number was reported in  
269 schools (44.33%, 43/97), followed by military camps (41.24%, 40/97), swimming

270 pools (9.28%, 9/97), and hospitals (5.15%, 5/97). The seasonality depended largely on  
271 the outbreak settings, with most of the military camps outbreaks occurring in winter  
272 (85.00%, 34/40), and most swimming pool outbreaks occurring in summer (88.89%,  
273 8/9), while school outbreaks usually occurred in spring and autumn during school  
274 terms as expected (69.77%, 30/43). A total of 41 deaths with confirmed HAdV  
275 infection were reported from 13 articles, with an overall case fatality rate of 0.03%  
276 (Table 1).

## 277 **Temporal and geographic pattern of HAdV types in China**

278       Sequence information was available for 70 outbreak events involving 12,044  
279 cases and 67 etiological surveillance studies involving 7,639 cases. The most common  
280 type responsible for outbreak events was HAdV-7, accounting for 45.71% (32/70) of  
281 the total number of outbreaks for which HAdV typing was performed, followed by  
282 HAdV-55 (16/70), HAdV-3 (11/70), HAdV-4 (7/70), and HAdV-14 (4/70). HAdV-7  
283 had the highest number of reported outbreaks in 2014, 2015 and 2017, while HAdV-  
284 55 (5) had the highest proportion of reported outbreaks in 2018 (Fig 2B). The case  
285 numbers involved in outbreaks caused by HAdV-7, HAdV-55 and HAdV-3 were  
286 7,048, 4,043 and 711, respectively, based on which the attack rate of HAdV-55 was  
287 estimated to be 27.18% (95% CI: 19.16–35.20), which was significantly higher than  
288 that of HAdV-7 (22.32%, 95% CI: 14.78–29.86) and HAdV-3 (5.55%, 95% CI: 2.63–  
289 8.48) (Table1). A difference of the predominant HAdV type in outbreak events was  
290 shown between Northern China and Southern China. Among all the outbreaks

291 reporting HAdV types and study sites, HAdV-55 (12 events involving 3,841 cases)  
292 and HAdV-7 (17 events involving 2,614 cases) were predominant in Northern China,  
293 while HAdV-7 (15 events involving 4,434 cases), HAdV-3 (seven events involving  
294 640 cases), and HAdV-55 (four events involving 202 cases) were predominant in  
295 Southern China (Fig 4A). According to the ecological regions of China, we found that  
296 HAdV-55 was the dominant HAdV type for outbreak events in four regions including  
297 Inner Mongolia-Xinjiang, North China, Qinghai-Tibet, and South China, while  
298 HAdV-7 was the dominant type in the others including Northeast China and Central  
299 China, except for one region(Southwest China) without reporting outbreaks with  
300 HAdV typing information (Fig 1 in S2 File).

301

302 **Fig 4. Comparison of number of outbreak events or etiological surveillance and**  
303 **case number with HAdV types by region, age, and setting.** (A) outbreaks in  
304 different regions; (B) etiological surveillance in different regions; (C) outbreaks in  
305 different age groups; (D) outbreaks in different settings. Solid circles in panels A, C,  
306 and D indicate the number of outbreaks, and hollow circles indicate the number of  
307 cases. Solid circles in panel B indicate the number of etiological surveillances, and  
308 hollow circles indicate the number of cases.

309

310 The predominant HAdV types differed from those in outbreak events. The most  
311 common type was HAdV-3 (2,869 cases), followed by HAdV-7 (2,518), HAdV-2

312 (772), HAdV-1 (466), HAdV-55 (258), and HAdV-5 (249). Both HAdV-3 and  
313 HAdV-7 had been shown an increasing pattern in the number of reported cases during  
314 the study period (Fig 2D). The positive rate of HAdV-3 was determined as 32.73%  
315 (95% CI: 22.13–43.34), which was significantly higher than that of HAdV-7  
316 (27.48%), HAdV-11 (16.14%), HAdV-2 (8.90%), HAdV-1 (6.70%), HAdV-55  
317 (4.70%), and HAdV-5 (3.55%). Both HAdV-3 and HAdV-7 were the common types  
318 identified in Northern and Southern China (Fig 4B, Table1).

319       Among 70 outbreaks providing information on age and HAdV type, HAdV-7  
320 (25) and HAdV-55 (15) were responsible for all the 40 outbreaks reported in the adult  
321 group; HAdV-7 (3) and HAdV-4 (3) were determined in the six outbreaks reported  
322 from children, while a higher diversity of types was observed in the 24 outbreaks  
323 reported in the adolescent group, including HAdV-3 (11), HAdV-4 (4), HAdV-7 (4),  
324 HAdV-14 (4), and HAdV-55 (1) (Fig 4C). Among the 70 outbreaks with reported  
325 settings and types, HAdV-7 (21) and HAdV-55 (12) were responsible for all the 33  
326 outbreaks in military camps, which involved 5,111 and 3,674 cases, respectively.  
327 HAdV-55 (3 outbreaks) and HAdV-7 (2) were responsible for the five outbreaks in  
328 hospitals, with 113 and 29 cases involved respectively. HAdV-3 (2 outbreaks),  
329 HAdV-4 (1), and HAdV-7 (2) were determined to be responsible for the five  
330 swimming pool outbreaks, with 199, 147, and 9 cases involved respectively. Five  
331 HAdV types were responsible for the 28 outbreaks in schools, including HAdV-3 (9),

332 HAdV-7 (7), HAdV-4 (6), HAdV-14 (4), and HAdV-55 (2), with 1, 761 cases  
333 infected with HAdV-7 and 512 cases with HAdV-3 infection (Fig 4D).

### 334 **Clinical manifestations**

335       Altogether, 105 articles with HAdV cases greater than 20 were included in the  
336 analysis of clinical manifestations. Among children with HAdV infection, cough was  
337 the most prevalent symptom, identified in 76.47% of the cases, followed by  
338 pneumonia (66.56%), expectoration (56.28%), respiratory failure (11.05%), breathing  
339 difficulties (34.69%), running nose (29.58%), vomiting (25.00%), and diarrhea  
340 (16.87%). Among adolescents, tonsillar enlargement (70.89%), pneumonia (21.69%)  
341 and vomiting (15.43%) were frequently seen. Among adults, less diverse clinical  
342 presentations were seen, including expectoration (31.19%), running nose (8.05%) and  
343 vomiting (4.60%) (Fig 5A, Table 12 in S2 File).

344

### 345 **Fig 5. Clinical manifestations of HAdV infection by age groups and virus types.**

346 (A) for different age groups; (B) for different virus types. The bars indicate the  
347 number of articles, and the intervals indicate the proportion of patients with the  
348 clinical manifestation and 95% CI based on the meta-analysis.

349

350       Compared with the infection of HAdV-55 and HAdV-7, HAdV-3 infection was  
351 related to higher frequency of cough (79.91%), running nose (20.59%) and vomiting  
352 (20.59%). HAdV-55 infection was related to higher frequency of tonsillar

353 enlargement (96.91%), pneumonia (27.91%), while lower occurrence of cough  
354 (56.61%), expectoration (45.10%), running nose (6.90%), and vomiting (3.37%),  
355 diarrhea (1.50%), compared with the infection of HAdV-3 and HAdV-7. HAdV-7  
356 infection was related to higher presence of expectoration (60.59%), breathing  
357 difficulties (26.80%), compared with the infections of HAdV-3 and HAdV-55 (Fig  
358 5B, Table 13 in S2 File).

359

## 360 **Discussion**

361 The current study provided a most comprehensive and up to date estimation on  
362 the attack rate/positive rate of HAdV as well as the dominant virus types, that differed  
363 across age, setting and seasons. Attack rates were significantly higher in outbreaks  
364 related to military camps and in the winter season. HAdV-55, HAdV-7 and HAdV-3  
365 were the major causative agents in the outbreak events. Outbreaks in military camps  
366 were more likely to be associated with HAdV-7 and HAdV-55, while outbreaks in  
367 other setting were associated with more HAdV genotypes, particularly for the school  
368 outbreaks. This was also in line with the higher diversity of virus types in the  
369 adolescent group, who constituted the major part of school outbreaks. These virus  
370 typing results contrasted with the etiological surveillance studies where HAdV-3 and  
371 HAdV-7 were the most frequently determined when an all-age group was studied. The  
372 current surveillance finding was highly consistent with the prior epidemiological



373 investigation performed in China, where HAdV-3 and HAdV-B7 were the most  
374 frequently detected among acute respiratory distress syndrome patients[21-24].

375 We found that school-related outbreaks were associated with the lowest attack  
376 rate, suggesting either a less confined space that limited the transmission or the lower  
377 transmission capacity relate to different HAdV types. We also revealed a different  
378 situation from that shown in other countries, for example, in the American troops,  
379 HAdV-4, HAdV-B7 and HAdV-B14 act as the predominant strains sequentially  
380 isolated from the outbreaks[7, 25-27]. HAdV vaccination program against the two-  
381 outbreak-related virus types in this high-risk population is urgently needed. Our meta-  
382 analysis showed that overall attack rate of adenovirus infection in outbreaks was  
383 estimated at 15.91% (95% CI: 13.85–17.98), which is comparable with the outbreak  
384 among college students in Pennsylvania, USA, of which a 15% (44/288) attack rate  
385 was reported based on the test of nasopharyngeal swabs for HAdV[28].

386 Our study for the first time revealed a clear seasonal pattern for the outbreak  
387 events. The school outbreaks occurred mostly at the beginning of new school years,  
388 while the military outbreaks mainly occurred at the recruit training seasons. A Korean  
389 study from 2013 to 2018 showed that HAdV was the most frequently detected  
390 respiratory virus in military recruits (6,646/14,630, 45.4%)[29]. HAdV has been  
391 implicated in over half of the febrile respiratory illness cases reported at recruit  
392 training center clinics.

393 A total of 17 virus types involving respiratory adenovirus infection have been  
394 reported in China, of which HAdV-3, HAdV-7 and HAdV-55 were predominant.  
395 Outbreaks were dominated by HAdV-7 and HAdV-55, while other types included  
396 HAdV-3, HAdV-4 and HAdV-14. The main virus types of outbreaks differ in  
397 different settings, with school outbreaks having more types, including HAdV-7,  
398 HAdV-55, HAdV-3, HAdV-4 and HAdV-14, with HAdV-3 and HAdV-7  
399 predominating; swimming pool outbreaks having mainly HAdV-3, HAdV-7 and  
400 HAdV-4, mainly in summer; hospital outbreaks and military outbreaks having mainly  
401 HAdV-7 and HAdV-55. The virus types of outbreaks vary by age groups, HAdV-7  
402 and HAdV-4 are dominant in children, HAdV-7 and HAdV-55 are dominant in adults,  
403 and more virus types are shown in adolescents, including HAdV-7, HAdV-55, HAdV-  
404 3, HAdV-4, and HAdV-14. There are more virus types detected in etiological  
405 surveillance, including HAdV-3, HAdV-7, HAdV-2, HAdV-1, HAdV-55, HAdV-5,  
406 etc. The most common types are HAdV-3 and HAdV-7 with an increasing trend along  
407 the **year**, which may be related to both the increasing number of infections and rising  
408 levels of surveillance. Differences in the main HAdV types in outbreak investigations  
409 and etiological surveillance reports suggest that HAdV-55 is more infectious and  
410 more likely to lead to outbreaks, whereas HAdV-3 is less infectious than HAdV-55  
411 and HAdV-7 and is easily detected during hospital-based surveillance. This may be  
412 because HAdV-55 is more symptomatic, more contagious and more likely to be  
413 reported. A study has shown that HAdV-7 replicates more robustly than HAdV-3, and

414 promotes an exacerbated cytokine response, causing a more severe airway  
415 inflammation[30]. In our study, the mortality rate of adenovirus infection in patients  
416 with respiratory infections was about 0.03%, while a study in Rio Grande Do Sul,  
417 Brazil showed a higher mortality rate (3%) among hospitalized patients with severe  
418 acute respiratory infection, which might be caused by a lower proportion of patients  
419 with severe respiratory infection in our study[13].

420 Overall, adenovirus circulates throughout the year, with slightly higher numbers  
421 reported during the summer and winter. Previous studies have shown that HAdV  
422 detection rates are positively associated with the monthly mean temperature and  
423 sunshine duration, and negatively associated with wind speed[31]. In our study, the  
424 main prevalent adenovirus types were HAdV-3, HAdV-7 and HAdV-55 in China,  
425 with other more frequent types such as HAdV-2, HAdV-4, HAdV-1 and HAdV-5.  
426 The main outbreak sites were schools and the military, with higher attack rates in the  
427 north than in the south. The prevalent virus typing varies between countries and  
428 regions. Species B, C and D are the most common adenoviruses worldwide, of which  
429 species B and C could cause respiratory infections. For species B, a low prevalence of  
430 HAdV-7, HAdV-11 and HAdV-35 was reported globally, however, it is high  
431 prevalence for HAdV-35 in some counties from Africa with a positive detection rate  
432 of about 20% among HIV-infected patients, and a high prevalence of HAdV-7 was  
433 reported in China, United States and Belgium. For species C, HAdV-5 was the widely  
434 distributed species, and HAdV-2 usually had a high positive detection rate among

435 healthy individuals and HIV-infected patients in China and developed countries[5].  
436 An epidemiologic study based on HAdV molecular typing was conducted in the  
437 Korean military from January 2013 to April 2014, and HAdV-55 (42.0%) was the  
438 most frequently identified strain, followed by HAdV-4 (13.0%), HAdV-5 (1.4%), and  
439 HAdV-6 (1.4%)[32]. HAdV-55 is a recently identified pathogen, which evolved from  
440 recombination between adenovirus 11 and 14[33, 34]. It was initially described as  
441 serotype 11a and was later re-labeled as HAdV-55 because of its recombinant  
442 genome[33], which is mainly found in China and Korea[35].

443       The clinical presentation varies by age group and by virus type. Most adenovirus  
444 respiratory infections are light to moderate and self-limited; however, sometimes they  
445 may cause life-threatening conditions, comorbidities, and serious sequelae. The rate of  
446 pneumonia is higher in children than in other age groups. In addition, the children are  
447 more likely to have breathing difficulties. Attention should be paid to the occurrence  
448 of adenovirus pneumonia in children. The main symptoms are fever and tonsil  
449 enlargement in adolescents while the main symptoms are cough and tonsil  
450 enlargement in adults. Adolescents and adults have a stronger immune system and the  
451 symptoms are mainly mild. Compared to other virus types, HAdV-55 is more likely to  
452 cause pneumonia and has a high prevalence in the military camps, so attention should  
453 be paid to the prevention and control of adenovirus in the military camps.

454       There were two main limitations to this study. First, inherent to systematic  
455 reviews, our study was influenced by publication bias. Most outbreaks are reported by

456 passive surveillance which may not be as comprehensive as in active surveillance, and  
457 are also subject to reporting biases. Secondly, as our data came from different studies,  
458 and did not have the same variables. This may have increased the likelihood of  
459 misclassification bias, also limited the number of variables that can be used for  
460 analysis.

461 Despite of these limitations, we have disclosed the prevalence of human  
462 infection with respiratory adenovirus and the major genotypes that differed over time,  
463 by location, and by demographical characteristics, e.g., patients' age. Comparing and  
464 contrasting the features across diverse settings can help to attain an enhanced  
465 epidemiological and clinical understanding of human infections with different HAdV  
466 types, and thus enhancing the accuracy of HAdV surveillance systems.

467

## 468 **Author Contributors**

469 The author contributions are as follows. LQF and WL conceived, designed, and  
470 supervised the study. MCL, QX, TTL, TW, BGJ and CLL searched, screened, and  
471 assessed the publications. MCL and TTL created data extraction forms and extracted  
472 and analyzed the data. QX, TW, BGJ, CLL and XAZ helped with checking data and  
473 constructed the figures. QX, TW, BGJ and CLL provided statistical and clinical  
474 expertise in data analysis. MCL and QX wrote the drafts of the manuscript. MCL and  
475 QX interpreted the findings. LQF and WL commented on and revised drafts of the

476 manuscript. All authors read the manuscript, provided feedback, and approved the  
477 final version.

478

## 479 **Data Availability Statement**

480 All relevant data are within the manuscript and its Supporting Information files.

481

## 482 **Declaration of interests**

483 We declare no competing interests.

484

## 485 **Financial Disclosure**

486 Natural Science Foundation of China (No. 81825019) was awarded to WL. The  
487 funders had no role in study design, data collection and analysis, decision to publish,  
488 or preparation of the manuscript.

489

## 490 **Acknowledgments**

491 The authors would like to thank all patients who contributed data and clinicians who  
492 collected the data.

493

## 494 **Reference**

495 1. Lynch JP 3rd, Fishbein M, Echavarría M. Adenovirus. *Semin Respir Crit Care*  
496 *Med.* 2011;**32**(4):494-511.

- 497 2. Antonia Ho, Richard Orton, Rachel Tayler, et al. Adeno-associated virus 2  
498 infection in children with non-A-E hepatitis. *medRxiv*, 2022.07.19.22277425  
499 [Preprint]. 2022 [cited 2022 Oct 9]. Available from:  
500 <https://www.medrxiv.org/content/10.1101/2022.07.19.22277425v1>.
- 501 3. Morfopoulou, S. et al. Genomic investigations of acute hepatitis of unknown  
502 aetiology in children. *medRxiv*, 2022.07.28.22277963 [Preprint]. 2022 [cited 2022 Oct  
503 9]. Available from:  
504 <https://www.medrxiv.org/content/10.1101/2022.07.28.22277963v1>.
- 505 4. Seto D, Chodosh J, Brister JR, Jones MS. Members of the adenovirus research  
506 community. Using the whole-genome sequence to characterize and name human  
507 adenoviruses. *J Virol*. 2011;**85**(11):5701-5702.
- 508 5. Mennechet FJD, Paris O, Ouoba AR, et al. A review of 65 years of human  
509 adenovirus seroprevalence. *Expert Rev Vaccines*. 2019;**18**(6):597-613.
- 510 6. Barrero PR, Valinotto LE, Tittarelli E, Mistchenko AS. Molecular typing of  
511 adenoviruses in pediatric respiratory infections in Buenos Aires, Argentina (1999-  
512 2010). *J Clin Virol*. 2012;**53**(2):145-150.
- 513 7. Ryan MA, Gray GC, Smith B, McKeehan JA, Hawksworth AW, Malasig MD.  
514 Large epidemic of respiratory illness due to adenovirus types 7 and 3 in healthy young  
515 adults. *Clin Infect Dis*. 2002;**34**(5):577-582.

- 516 8. Kajon AE, Lu X, Erdman DD, et al. Molecular epidemiology and brief history of  
517 emerging adenovirus 14-associated respiratory disease in the United States. *J Infect*  
518 *Dis.* 2010;**202**(1):93-103.
- 519 9. Mi Z, Butt AM, An X, et al. Genomic analysis of HAdV-B14 isolate from the  
520 outbreak of febrile respiratory infection in China. *Genomics.* 2013;**102**(5-6):448-455.
- 521 10. Lu G, Peng X, Li R, et al. An outbreak of acute respiratory infection at a training  
522 base in Beijing, China due to human adenovirus type B55. *BMC Infect Dis.*  
523 2020;**20**(1):537.
- 524 11. Hoke CH Jr, Snyder CE Jr. History of the restoration of adenovirus type 4 and  
525 type 7 vaccine, live oral (Adenovirus Vaccine) in the context of the Department of  
526 Defense acquisition system. *Vaccine.* 2013;**31**(12):1623-1632.
- 527 12. Lynch JP 3rd, Kajon AE. Adenovirus: Epidemiology, global spread of novel  
528 serotypes, and advances in treatment and prevention. *Semin Respir Crit Care Med.*  
529 2016;**37**(4):586-602.
- 530 13. Pscheidt VM, Gregianini TS, Martins LG, Veiga ABGD. Epidemiology of human  
531 adenovirus associated with respiratory infection in southern Brazil. *Rev Med Virol.*  
532 2021;**31**(4):e2189.
- 533 14. Mao NY, Zhu Z, Zhang Y, Xu WB. Current status of human adenovirus infection  
534 in China. *World J Pediatr.* 2022;**18**(8):533-537.



- 535 15. Yao LH, Wang C, Wei TL, Wang H, Ma FL, Zheng LS. Human adenovirus  
536 among hospitalized children with respiratory tract infections in Beijing, China, 2017-  
537 2018. *Viol J.* 2019;**16**(1):78.
- 538 16. Wang C, Liu J, Mi Y, Chen J, Bi J, Chen Y. Clinical features and epidemiological  
539 analysis of respiratory human adenovirus infection in hospitalized children: a cross-  
540 sectional study in Zhejiang. *Viol J.* 2021;**18**(1):234.
- 541 17. Page MJ, McKenzie JE, Bossuyt PM, et al. The PRISMA 2020 statement: an  
542 updated guideline for reporting systematic reviews. *BMJ.* 2021;**372**:n71.
- 543 18. Porta M. A dictionary of epidemiology, 5th edn. *J Epidemiol Community Health*  
544 2006;**60**:653.
- 545 19. Wang LP, Zhou SX, Wang X, et al. Etiological, epidemiological, and clinical  
546 features of acute diarrhea in China. *Nat Commun.* 2021;**12**(1):2464.
- 547 20. Rowe WP, Huebner RJ, Gilmore LK, Parrott RH, Ward TG. Isolation of a  
548 cytopathogenic agent from human adenoids undergoing spontaneous degeneration in  
549 tissue culture. *Proc Soc Exp Biol Med.* 1953;**84**(3):570-573.
- 550 21. Deng J, Qian Y, Zhao LQ, Zhu RN, Sun Y, Tian R. Identification and typing of  
551 adenovirus from acute respiratory infections in pediatric patients in Beijing from 2003  
552 to 2012. *Chinese journal of virology.* 2013;**29**(6):615-20. Chinese.
- 553 22. Jin Y, Zhang RF, Xie ZP, et al. Prevalence of adenovirus in children with acute  
554 respiratory tract infection in Lanzhou, China. *Viol J.* 2013;**10**:271.

- 555 23. Lu QB, Tong YG, Wo Y, et al. Epidemiology of human adenovirus and molecular  
556 characterization of human adenovirus 55 in China, 2009-2012. *Influenza Other Respir*  
557 *Viruses*. 2014;**8**(3):302-308.
- 558 24. Cao B, Huang GH, Pu ZH, et al. Emergence of community-acquired adenovirus  
559 type 55 as a cause of community-onset pneumonia. *Chest*. 2014;**145**(1):79-86.
- 560 25. Kolavic-Gray SA, Binn LN, Sanchez JL, et al. Large epidemic of adenovirus type  
561 4 infection among military trainees: epidemiological, clinical, and laboratory studies.  
562 *Clin Infect Dis*. 2002;**35**(7):808-818.
- 563 26. Binder AM, Biggs HM, Haynes AK, et al. Human adenovirus surveillance -  
564 United States, 2003-2016. *MMWR Morb Mortal Wkly Rep*. 2017;**66**(39):1039-1042.
- 565 27. Kajon AE, Lamson DM, St George K. Emergence and re-emergence of  
566 respiratory adenoviruses in the United States. *Curr Opin Virol*. 2019;**34**:63-69.
- 567 28. Biggs HM, Lu X, Dettinger L, Sakthivel S, et al. Adenovirus-associated influenza-  
568 like illness among college students, Pennsylvania, USA. *Emerg Infect Dis*.  
569 2018;**24**(11):2117-2119.
- 570 29. Ko JH, Woo HT, Oh HS, et al. Ongoing outbreak of human adenovirus-associated  
571 acute respiratory illness in the Republic of Korea military, 2013 to 2018. *Korean J*  
572 *Intern Med*. 2021;**36**(1):205-213.
- 573 30. Fu Y, Tang Z, Ye Z, et al. Human adenovirus type 7 infection causes a more  
574 severe disease than type 3. *BMC Infect Dis*. 2019;**19**(1):36.

- 575 31. Tian JY, Hu AH, Pan JG, et al. An outbreak of acute respiratory tract infection  
576 caused by adenovirus serotype 7 in a military camp in Shanxi province. *J Pre Med*  
577 *Chin PLA*. 2014;**32**:203–205.
- 578 32. Heo JY, Noh JY, Jeong HW, et al. Molecular epidemiology of human adenovirus-  
579 associated febrile respiratory illness in soldiers, South Korea. *Emerg Infect Dis*  
580 2018;**24**(7):1221-1227.
- 581 33. Yang Z, Zhu Z, Tang L, et al. Genomic analyses of recombinant adenovirus type  
582 11a in China. *J Clin Microbiol* 2009;**47**(10):3082-3090.
- 583 34. Walsh MP, Seto J, Jones MS, et al. Computational analysis identifies human  
584 adenovirus type 55 as a re-emergent acute respiratory disease pathogen. *J Clin*  
585 *Microbiol* 2010;**48**(3):991-993.
- 586 35. Hang J, Kajon AE, Graf PCF, et al. Human adenovirus type 55 distribution,  
587 regional persistence, and genetic variability. *Emerg Infect Dis* 2020;**26**(7):1497-1505.

588

## 589 **Supporting information**

590 **S1 File. PRISMA checklist.**

591 **S2 File. Supplementary appendix.**

592 **S3 File. Forest plot.**

593 **S4 File. List of references.**

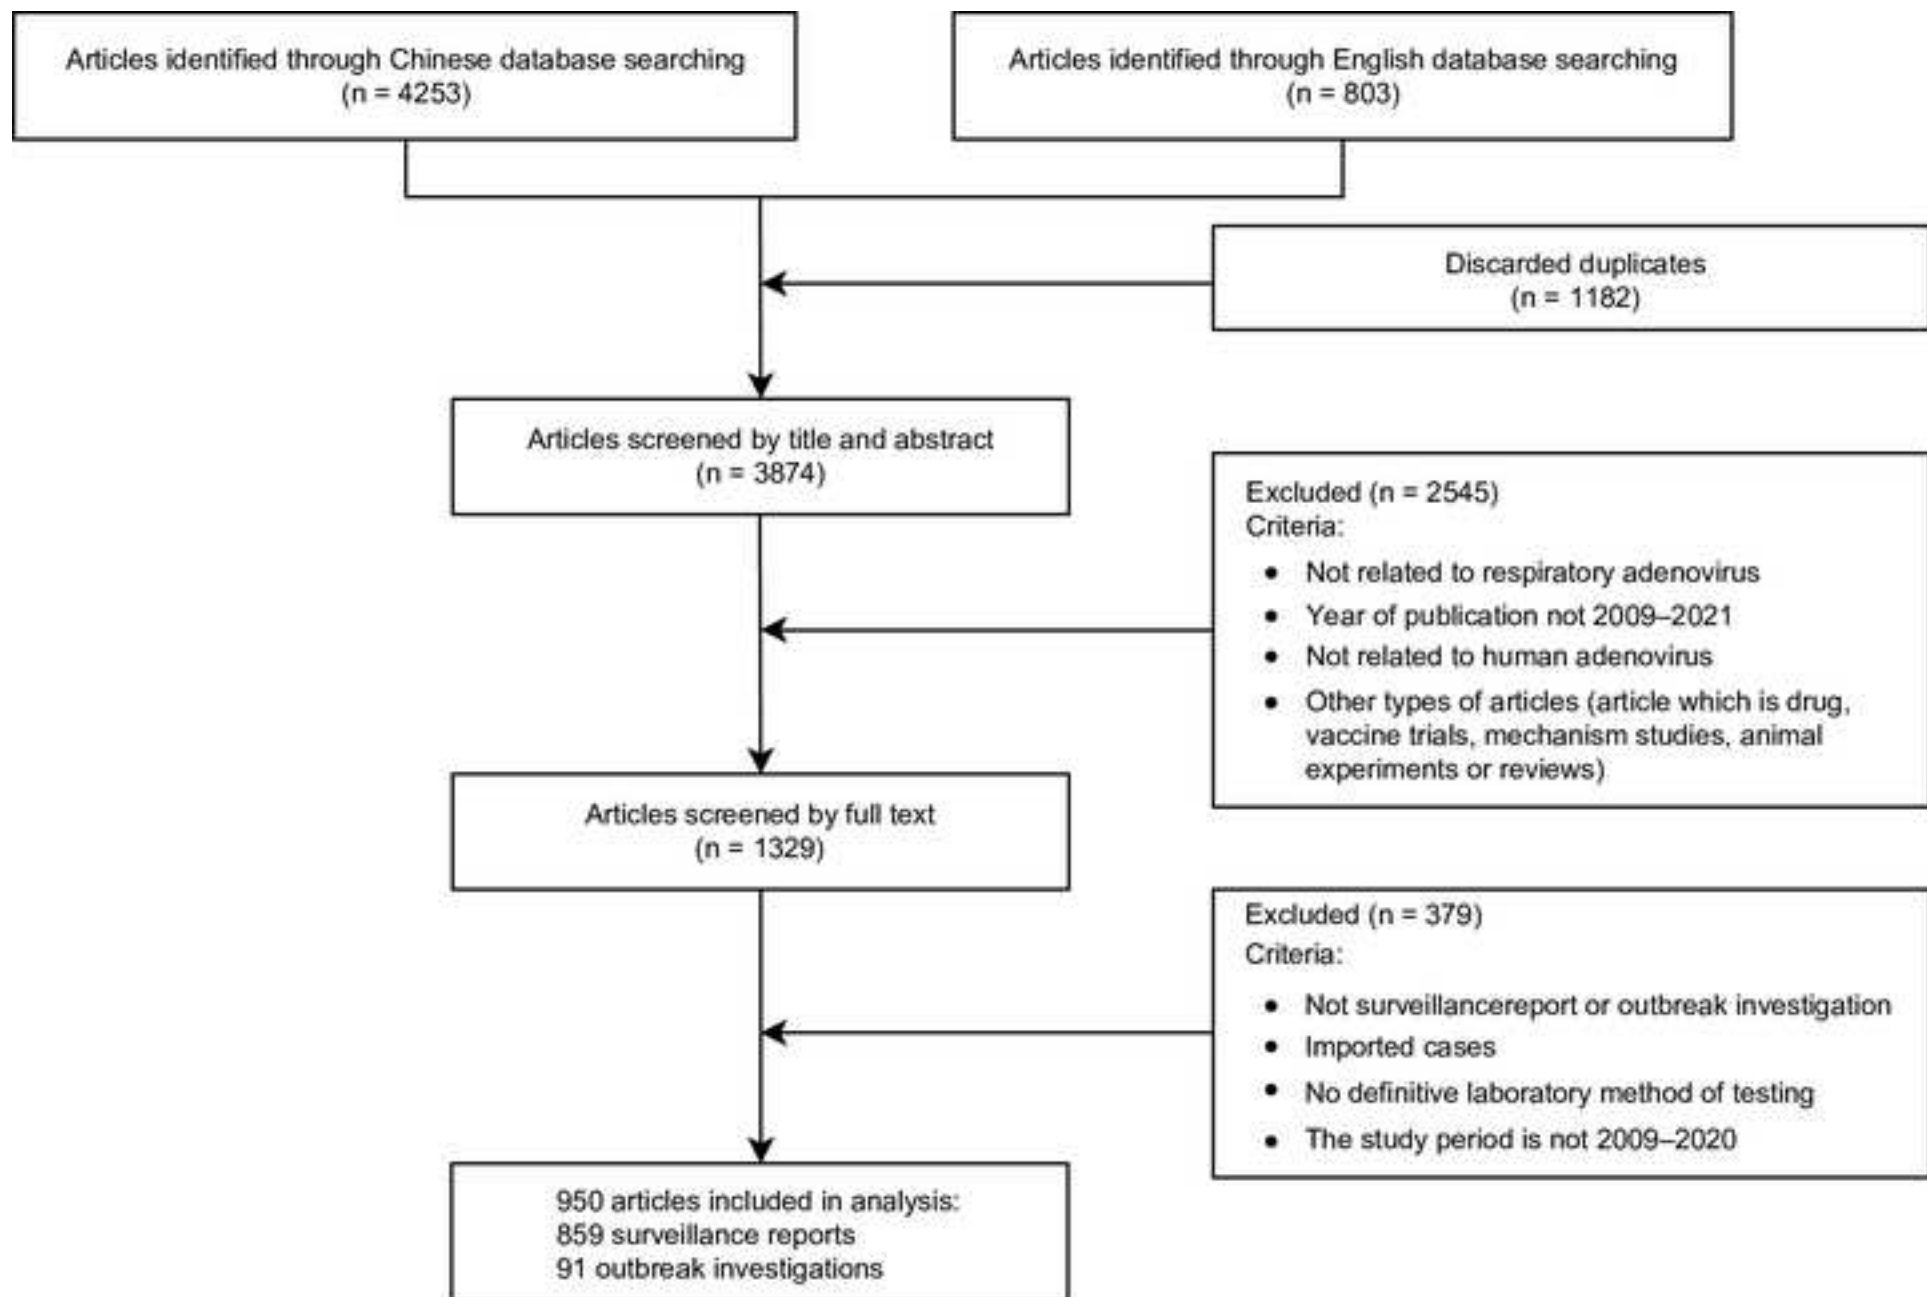

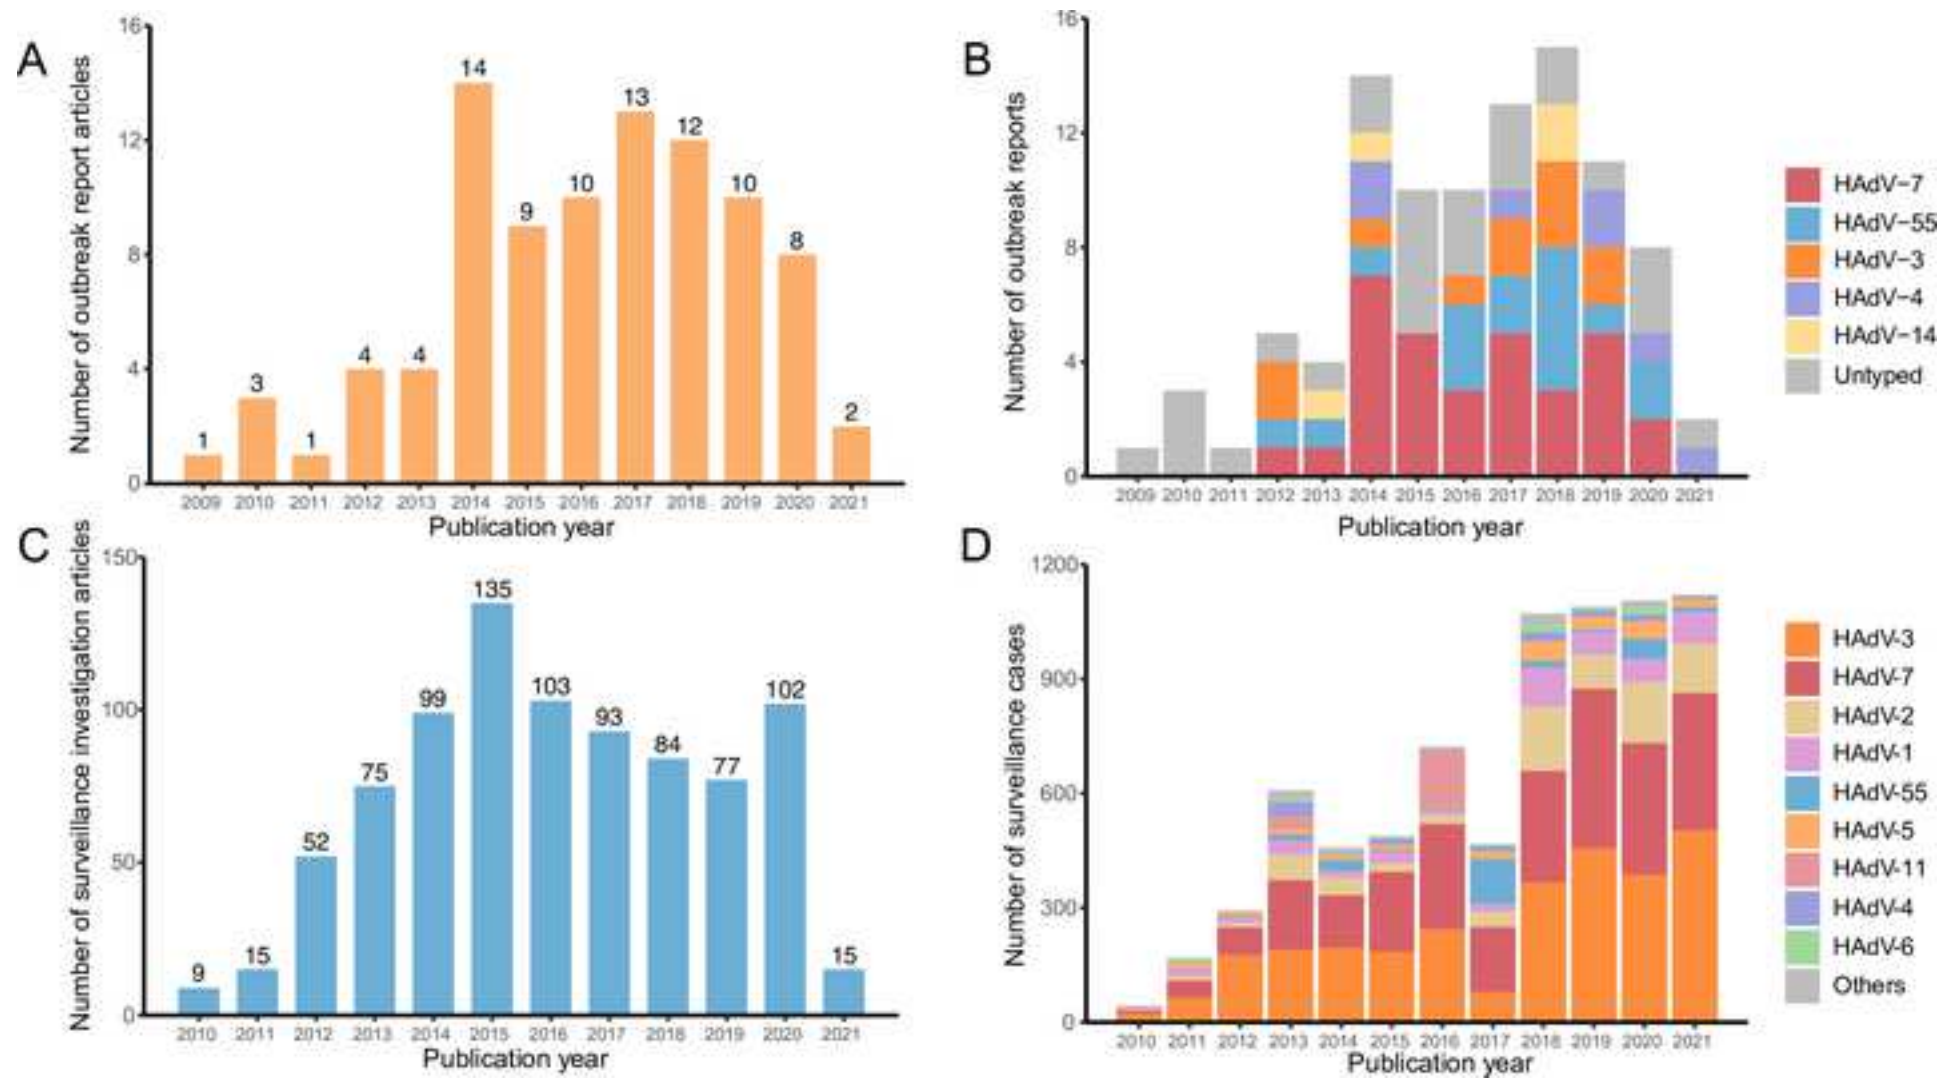

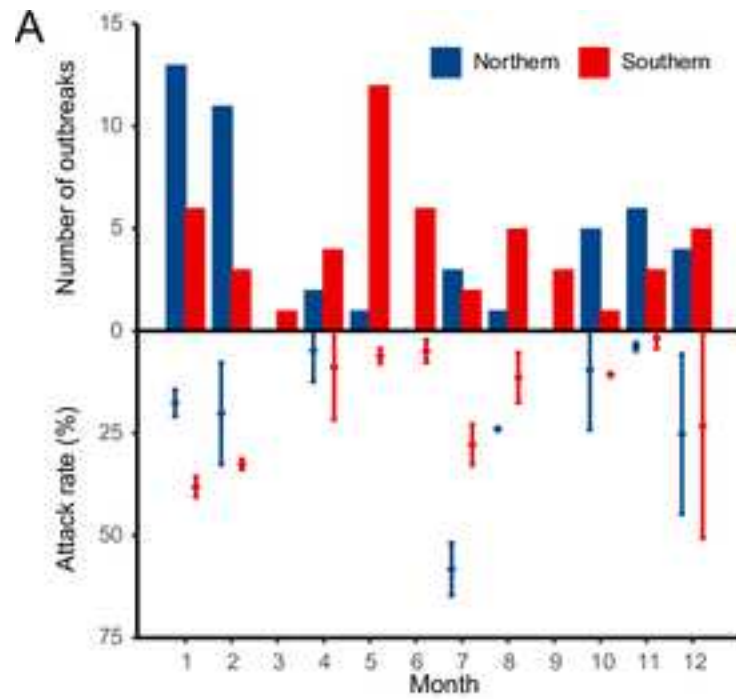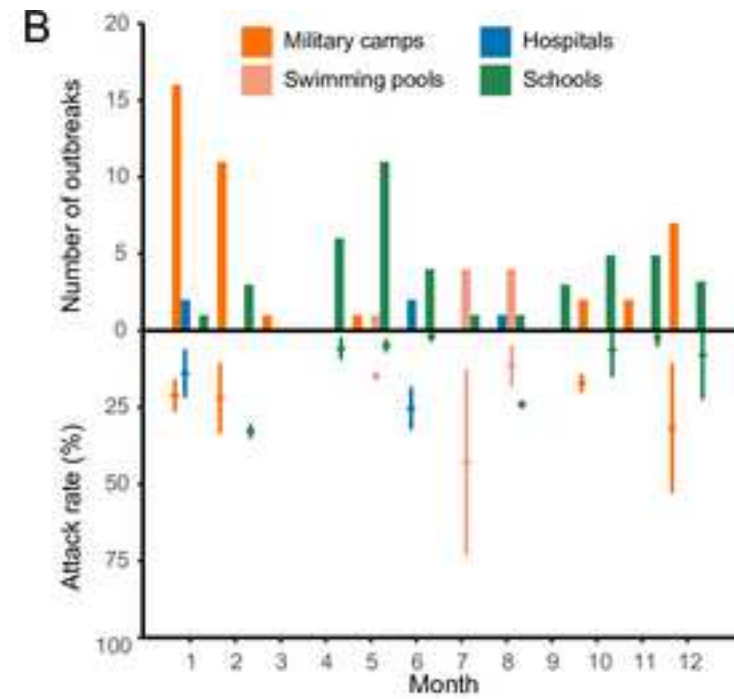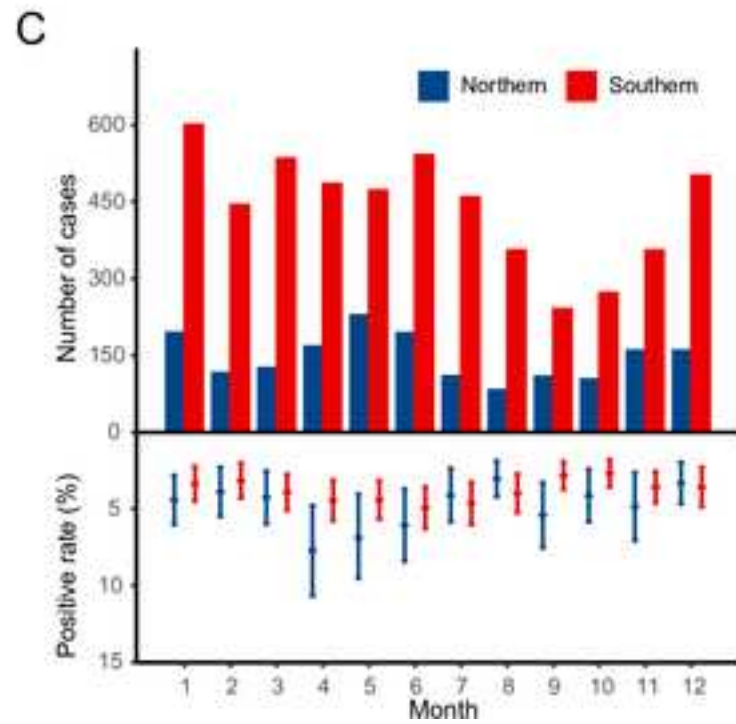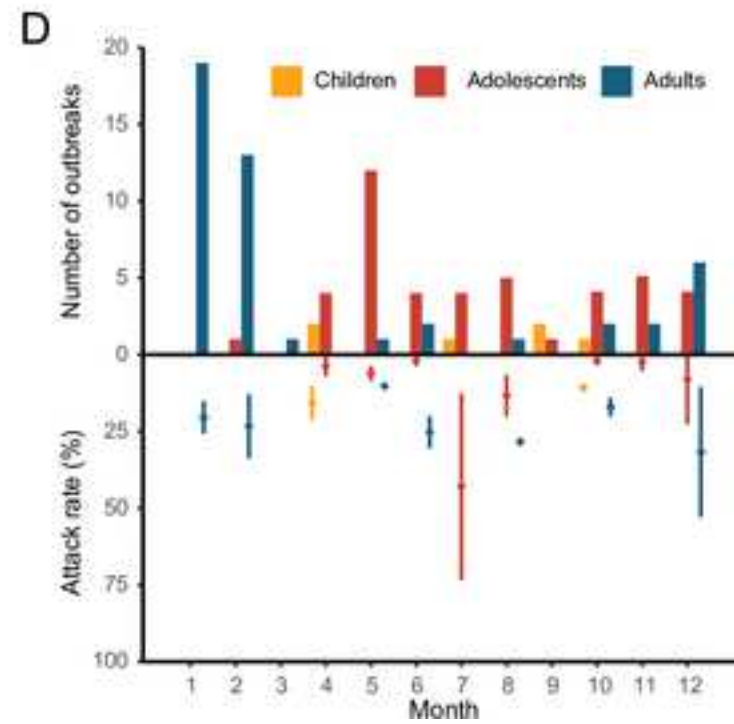

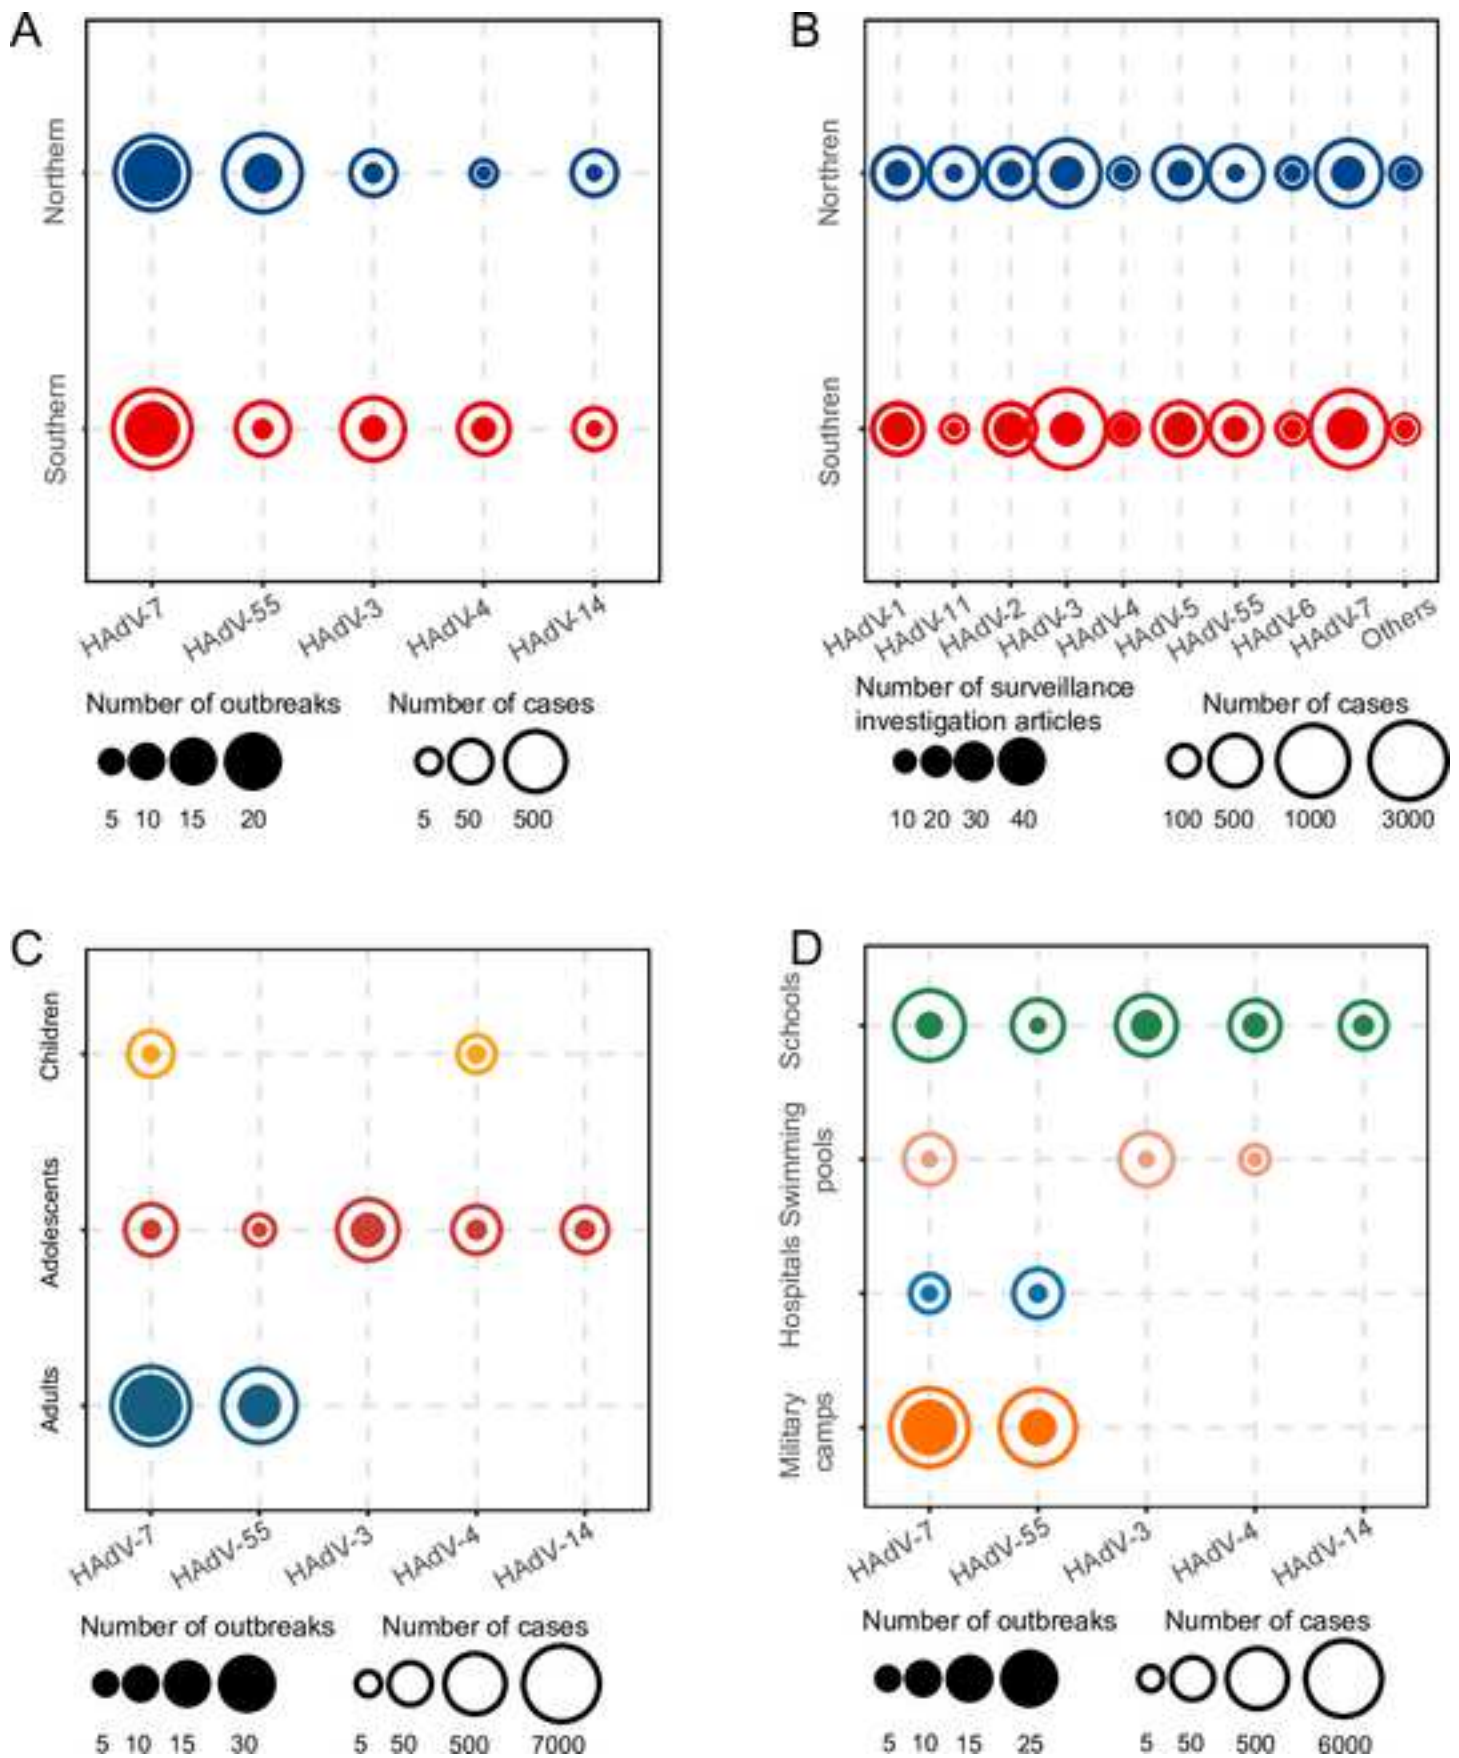

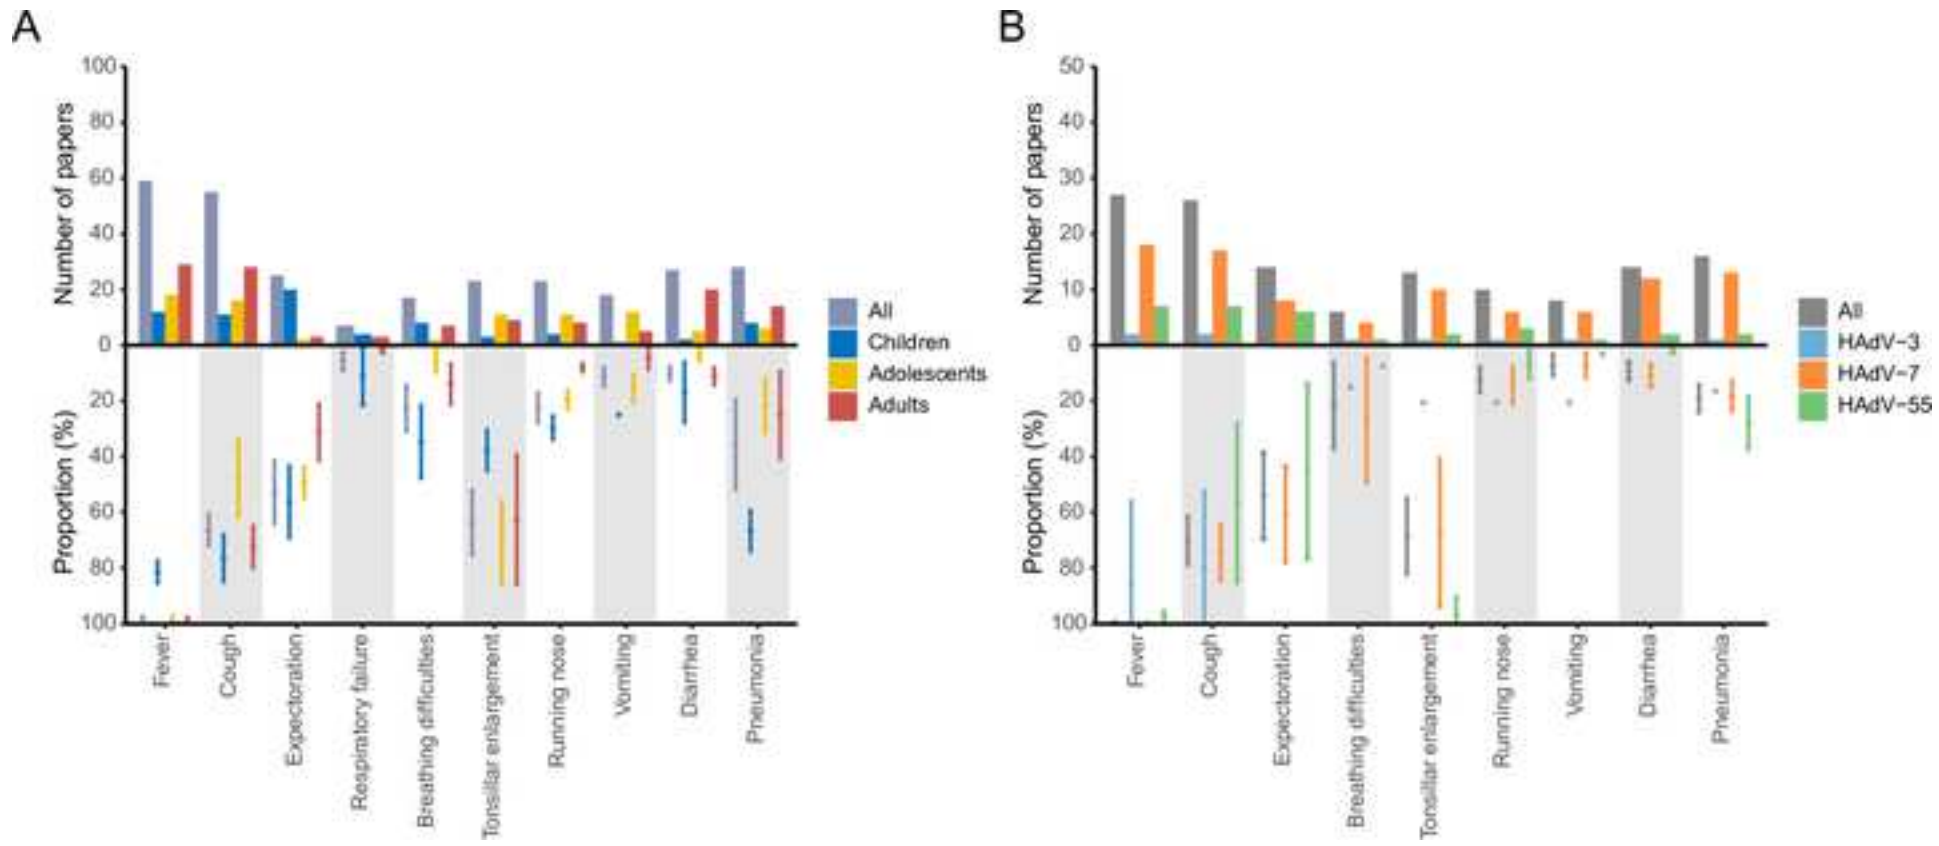



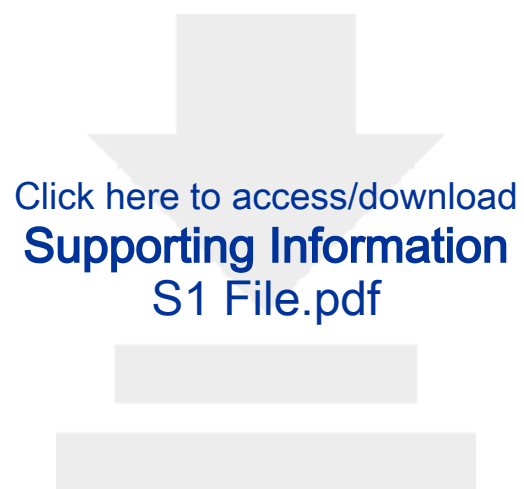

Click here to access/download  
**Supporting Information**  
S1 File.pdf

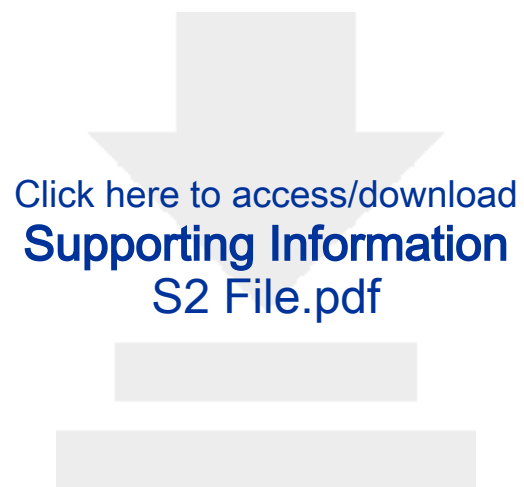

Click here to access/download  
**Supporting Information**  
S2 File.pdf

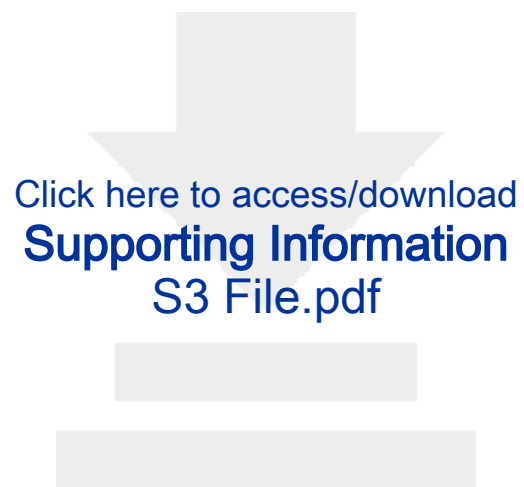

Click here to access/download  
**Supporting Information**  
S3 File.pdf



Click here to access/download  
**Supporting Information**  
S4 File.xlsx



## Responses to the reviewers' comments

### Title

Reviewer #1:

It would be good to clarify if this article is a prevalence study or not.

**[Response] We appreciate the reviewer's helpful suggestion. We have added the prevalence study to the title as: "Prevalence of human infection with respiratory adenovirus in China: a systematic review and meta-analysis". (Page 1, Lines 1–2)**

### Abstract

Reviewer #1:

Methods should be written in more detail about the study design, sampling, and clinical manifestation.

**[Response] Thanks for the reviewer's suggestions. We have supplemented the study design, sampling, and clinical manifestation in the Abstract as: "A systematic review was performed to retrieve literature that reported outbreaks or etiological surveillance of HAdV among ARTI patients in China from 2009 to 2020. Patient information was extracted from the literature to explore the epidemiological characteristics and clinical manifestations of the infection of various HAdV types. The study is registered with PROSPERO, CRD42022303015". (Page 2, Lines 24–28)**

### Introduction

Reviewer #1:

1.The introduction needs to be improved by adding some information about the global prevalence, mortality, morbidity, and burden of HAdV both worldwide and in China.

**[Response] Many thanks for the reviewer's helpful suggestions. We have supplemented the information about the global prevalence, mortality, morbidity, and burden of HAdV both worldwide and in China as: "A global study concluded that adenovirus infections accounted for 5–10% of respiratory infections in children and 1–7% in adults, and caused pneumonia in up to 20% of newborns and infants. In patients with severe HAdV pneumonia, the mortality rate may exceed 50%[12]. The positive detection rate of adenovirus was 3.9% and the mortality rate was 3% from 2004 to 2018 among inpatients hospitalized due to severe acute respiratory infection[13]. Studies in mainland China have shown that positive detection rate of adenovirus among ARTI patients was approximately 5.8%–13%, and the main affected groups were children and young adults[14]. Studies showed that the positive detection rate of adenovirus was 5.64% among hospitalized children with ARTI in Beijing from 2017 to 2018 and 6.9% in Zhejiang from 2018 to 2019[15,16]". (Page 6, Lines 129–139)**

2.Page 4, line 75: "Here we conduct a systematic review of all published research..." isn't that a systematic review and meta-analysis?

**[Response] Thanks. We have corrected this sentence as "Here we conduct a systematic review and meta-analysis of all published research articles on**

**outbreak investigation and etiological surveillance of HAdV among ARTI patients in China at the nation-wide level from January 2009 to 2020, to evaluate the HAdV prevalence, types, seasonality, as well as to characterize patients' demographic and clinical data". (Page 6, Line 142–156)**

## **Methods**

Reviewer #1:

1. Page 5, line 109: Part 6 of the exclusion criteria says "Study period beyond the duration 2009-2020" while the authors indicated data extraction was conducted between Jan 2009 and Mar 2021. Also, in Appendix 1 study period is 2009-2021 but in table S3 it is from 2009 to 2020. Please explain the difference.

**[Response] Thanks for the reviewer's helpful comments. We extracted the literature in March 2021 for the study period from 2009 to 2020. We have addressed this issue throughout the manuscript.**

2. In appendix 1 figure S1, I can't see the distribution of adenovirus typing pie chart for southwest China on the map!

**[Response] Many thanks for the reviewer's helpful comments. Few studies reported the status of respiratory adenovirus infections in Southwest China, where no data has been reported on the adenovirus typing. We have supplemented the information in the notes of fig 1 in S2 File.**

3. There is not enough information about how the quality assessment was done! Please state the exact method that has been used, provide a complete checklist of risk of bias as an appendix, and address the references.

**[Response] We appreciate the reviewer's valuable suggestions. Our exclusion criteria partially accounted for the quality of studies, e.g., The study requires an adequate sample size, complete outcome data, complete laboratory testing standards, specific testing criteria. To evaluate the methodological quality of the studies, two reviewers (MCL and TTL) independently assessed each study potentially eligible for inclusion. Discrepancies between reviewers were resolved by consensus or a third reviewer (QX). One of the authors (MCL) extracted data from included studies using a standardized data collection form. For quality assurance, another two authors (QX, TW) randomly sampled 25% of recorded data to confirm accuracy and completeness. We followed the PRISMA checklist to complete the meta-analysis. S4 File contains all included literature, and the full checklist has been provided in S1 File.**

4. Page 6, lines 131-133: "an outbreak event was defined..." is there any reference for this definition?

**[Response] Thanks for the reviewer's helpful comments. We have supplemented a reference (Ref. 18) for this definition.**

5. Please report sensitivity and specificity of laboratory determination methods that

have been used.

**[Response] Thanks for the reviewer's valuable suggestion. It is pity that the information about sensitivity and specificity of laboratory determination methods is not available due to the data were from the literature, of which the related information was not reported.**

Reviewer #2:

The hypothesis and objectives of the work are clearly stated.

The selection of the articles is carried out properly.

Statistical analyzes are adequate.

**[Response] Many thanks for the reviewer's positive comments.**

Reviewer #3:

The study is a systematic review and meta-analysis about human adenovirus (HAdV) infection associated with respiratory disease in China. The methodology is in accordance with a systematic review and met analysis article.

**[Response] Many thanks for the reviewer's positive comments.**

## **Results**

Reviewer #1:

There could have been data from HAdV vaccination in China among all age groups and a proper comparison of HAdV incidence between vaccinated and non-vaccinated individuals.

**[Response] Many thanks for the reviewer's helpful suggestion. However, there is no available adenovirus vaccine in China up to now, and all patients in this study were considered not to be vaccinated.**

There could have been information about the most common type of HAdV separated by year from fig2B and fig2C.

**[Response] Many thanks for the reviewer's helpful suggestions. We have supplemented a detailed description about the most common type of HAdV as: "The most common type responsible for the outbreak events was HAdV-7, accounting for 45.71% (32/70) of all outbreaks with information about HAdV typing, followed by HAdV-55 (16/70), HAdV-3 (11/70), HAdV-4 (7/70), and HAdV-14 (4/70). HAdV-7 had the highest number of reported outbreaks in 2014, 2015 and 2017, while HAdV-55 (5) had the highest proportion of reported outbreaks in 2018 (Fig 2B)." (Page 17, Lines 473–478) "Both HAdV-3 and HAdV-7 had been shown an increasing pattern in the number of reported cases during the study period (Fig 2D)". (Page 19, Lines 527–529)**

Reviewer #2:

The results section describes very well the analysis carried out considering three different age ranges, and important to describe.

The graphs are well designed and display the results in an easy to view manner.

The comparative table is correct and presents valuable information comparing outbreaks and surveillance.

**[Response] Many thanks the reviewer's positive comments.**

Reviewer #3:

A total of 5056 studies were identified, of which 950 articles met the inclusion criteria and were analyzed in the study. The study analyzed both articles from outbreak studies as well as from surveillance studies.

Presentations of results could be improved, especially concerning use of expressions and words not well explained in the text, grammar errors that make the text hard to understand, including in Figure legends.

**[Response] Many thanks for the reviewer's helpful suggestions. We have a senior author with fluent English check the language throughout the manuscript carefully, and the presentations of results and figure legends have been improved in the revised manuscript.**

## **Discussion**

Reviewer #1:

Page 17 line 3: "The prevalent typing varies..." presented common HAdV types in the United States from 2003-2016. It would be better if authors used the same time period for comparison as the current study. And please mention the most common types globally not just one country like the USA.

**[Response] We appreciate the reviewer's helpful suggestion. We have added a corresponding description in the discussion as: "The prevalent virus typing varies between countries and regions. Species B, C and D are the most common adenoviruses worldwide, of which species B and C could cause respiratory infections. For species B, a low prevalence of HAdV-7, HAdV-11 and HAdV-35 was reported globally, however, it is high prevalence for HAdV-35 in some counties from Africa with a positive detection rate of about 20% among HIV-infected patients, and a high prevalence of HAdV-7 was reported in China, United States and Belgium. For species C, HAdV-5 was the widely distributed species, and HAdV-2 usually had a high positive detection rate among healthy individuals and HIV-infected patients in China and developed countries[5]". (Page 24, Line 690–704)**

## **Reference**

Reviewer #1:

Please add journal issue after volume number.

**[Response] Thanks. Done as suggested.**



Reference order could have been reported by year, but it looks fine this way.

**[Response] Thanks. We have revised the order of references according to the year of publication (Data in S4 File).**

### **Minor issues**

Reviewer #1:

There is no line number after page 10.

**[Response] Thanks. Done as suggested.**

Page 11, first paragraph line 5: rat  $\diamond$  rate

**[Response] Many thanks for the reviewer's correction. We have made this correction as suggested.**

Reviewer #2: The discussion is correct, with updated bibliography.

The results support the discussion and the conclusion reached by the authors.

The limitations of the study are clearly stated in the discussion.

**[Response] Thanks for the reviewer's positive comments.**

Reviewer #3: The study discusses the analyses performed and its findings, comparing with studies from some other countries. I suggest including a discussion about mortality associated with HAdV infection, comparing findings of the study (0.03 mortality) with other studies, for example the study by Pscheidt et al. (2020 - <https://doi.org/10.1002/rmv.2189>) that found 3% fatalities among patients hospitalized with severe respiratory infection and who were HAdV-positive.

**[Response] Many thanks for the reviewer's helpful suggestions. We have supplemented the discussion about the mortality associated with HAdV infection, comparing findings of our study with other studies as: "In our study, the mortality rate of adenovirus infection in patients with respiratory infections was about 0.03%, while a study in Rio Grande Do Sul, Brazil showed a higher mortality rate (3%) among hospitalized patients with severe acute respiratory infection, which might be caused by a lower proportion of patients with severe respiratory infection in our study[13]." (Page 24, Line 678–682)**

### **Summary and General Comments**

Reviewer #1: The manuscript "Human infection with respiratory adenovirus in China: a systematic review and meta-analysis" is a review of 950 articles that describes Human adenovirus (HAdV) prevalence, predominant types, clinical manifestation among different age groups and settings, national wide. The objective is interesting, although it needs some revisions before acceptance.

**[Response] We appreciate the reviewer's positive comments and helpful suggestions.**

Reviewer #2: The manuscript entitled “Human infection with respiratory adenovirus in China: a systematic review and meta-analysis”, authored by Mei-Chen Liu et al, described the epidemiological and clinical features of HAdV infections in China, from January 2009 to March 2021. In addition, the genetic and epidemiological characteristics of HAdVs were investigated.

I want to emphasize that the work is very well written and concisely covers all the epidemiological characteristics of HAdV respiratory infections.

The work carried out is a very important contribution to the knowledge of the classical and molecular epidemiology of HAdV in China and also provides valuable information worldwide.

**[Response] Many thanks for the reviewer’s positive comments.**

Reviewer #3: The study is interesting and is worth publication, however thorough English revision is necessary. I recommend revision by a native English speaker.

Main comments and corrections were made in the pdf file, attached.

**[Response] Many thanks for the reviewer’s positive comments and corrections.**

**We have a senior author with fluent English check the language carefully.**

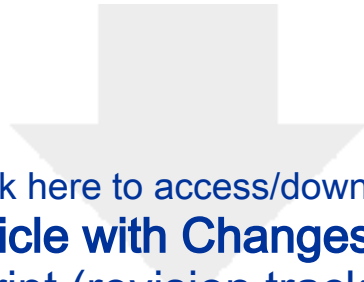

[Click here to access/download](#)

**Revised Article with Changes Highlighted**  
Manuscript (revision tracked).docx

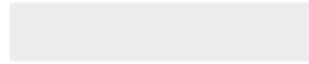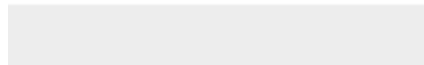

Supplement: pntd.0011151.s007.pdf [file pntd.0011151.s007.pdf]
